# Supplementary material for: Transporter gene family evolution in ectomycorrhizal fungi in relation to mineral weathering capabilities
Source: Copernicus journal article supplement (doi:10.5194/bg-22-8047-2025), 2025-12-17
Supplement: Supplementary file 1 [file Supplementary_Figure_S1.pdf › Supplementary_Figure_S1.pdf]

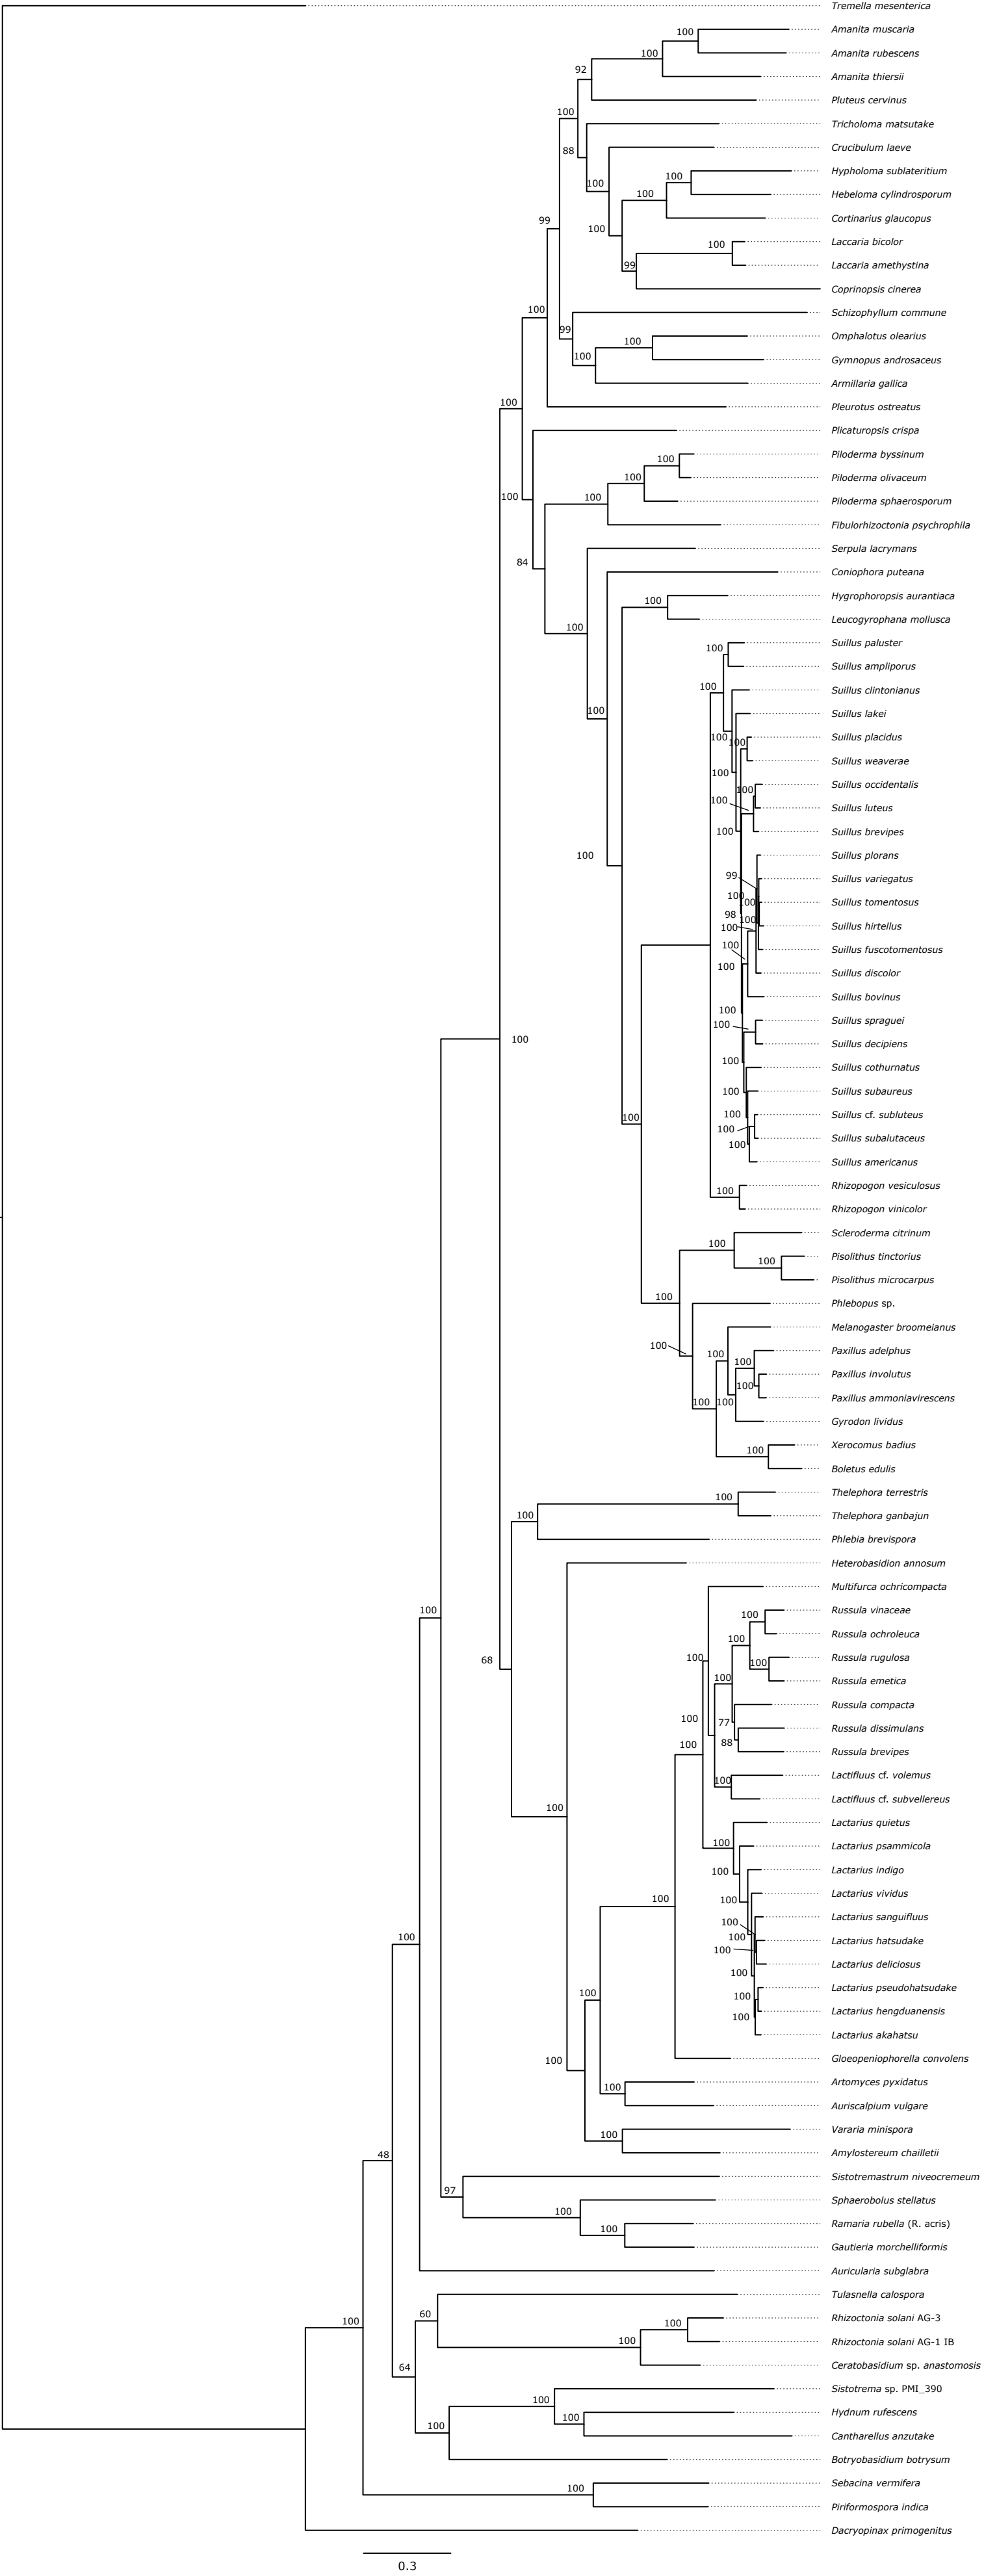

Figure S1 - Maximum likelihood phylogenomic tree based on 152 single copy orthologs of 108 Agaricomycotina taxa. Numbers at each node indicate the bootstrap value.
