# Supplementary material for: Transporter gene family evolution in ectomycorrhizal fungi in relation to mineral weathering capabilities
Source: Copernicus journal article supplement (doi:10.5194/bg-22-8047-2025), 2025-12-17
Supplement: Supplementary file 1 [file Supplementary_Tables.xlsx]

## Sheet: Table S1
Table S1 – Species list of the 108 Agaricomycotina genomes used in the full dataset, including taxonomic information, taxa abbreviation, lifestyle information and reference.
Class	Order	Family	Genus	Species	Abbreviation	Lifestyle	Reference
Tremellomycetes	Tremellales	Tremellaceae	Tremella	Tremella mesenterica	Treme	White-rot	Floudas et al., 2012
Agaricomycetes	Agaricales	Amanitaceae	Amanita	Amanita rubescens	Amarub	Ectomycorrhizal	Miyauchi et al., 2020
Agaricomycetes	Agaricales	Amanitaceae	Amanita	Amanita muscaria	Amamu	Ectomycorrhizal	Kohler et al., 2015
Agaricomycetes	Agaricales	Amanitaceae	Amanita	Amanita thiersii	Amath	Litter decayer	Hess et al., 2014
Agaricomycetes	Agaricales	Pluteaceae	Pluteus	Pluteus cervinus	Plucer	White-rot	Varga et al., 2019
Agaricomycetes	Agaricales	Tricholomataceae	Tricholoma	Tricholoma matsutake	Trima	Ectomycorrhizal	Miyauchi et al., 2020
Agaricomycetes	Agaricales	Nidulariaceae	Crucibulum	Crucibulum laeve	Crula	White-rot	Varga et al., 2019
Agaricomycetes	Agaricales	Strophariaceae	Hypholoma	Hypholoma sublateritium	Hypsu	Wood decayer	Kohler et al., 2015
Agaricomycetes	Agaricales	Hymenogastraceae	Hebeloma	Hebeloma cylindrosporum	Hebcy	Ectomycorrhizal	Kohler et al., 2015
Agaricomycetes	Agaricales	Cortinariaceae	Cortinarius	Cortinarius glaucopus	Corgl	Ectomycorrhizal	Miyauchi et al., 2020
Agaricomycetes	Agaricales	Hydnangiaceae	Laccaria	Laccaria bicolor	Lacbi	Ectomycorrhizal	Martin et al., 2008
Agaricomycetes	Agaricales	Hydnangiaceae	Laccaria	Laccaria amethystina	Lacam	Ectomycorrhizal	Kohler et al., 2015
Agaricomycetes	Agaricales	Psathyrellaceae	Coprinopsis	Coprinopsis cinerea	Copci	Saprotroph	Stajich et al., 2010
Agaricomycetes	Agaricales	Schizophyllaceae	Schizophyllum	Schizophyllum commune	Schco	White-rot	Ohm et al., 2010
Agaricomycetes	Agaricales	Omphalotaceae	Omphalotus	Omphalotus olearius	Ompol	Wood decayer	Wawrzyn et al., 2012
Agaricomycetes	Agaricales	Omphalotaceae	Gymnopus	Gymnopus androsaceus	Gyman	Litter decayer	Barbi et al., 2020
Agaricomycetes	Agaricales	Physalacriaceae	Armillaria	Armillaria gallica	Armga	Pathogen	Sipos et al., 2017
Agaricomycetes	Agaricales	Pleurotaceae	Pleurotus	Pleurotus ostreatus	PleosPC	White-rot	Riley et al., 2014
Agaricomycetes	Amylocorticiales	Amylocorticiaceae	Plicaturopsis	Plicaturopsis crispa	Plicr	White-rot	Kohler et al., 2015
Agaricomycetes	Atheliales	Atheliaceae	Piloderma	Piloderma sphaerosporum	Pilsph	Ectomycorrhizal	JGI Mycocosm 1KFG project
Agaricomycetes	Atheliales	Atheliaceae	Piloderma	Piloderma olivaceum	Pilcr	Ectomycorrhizal	Kohler et al., 2015
Agaricomycetes	Atheliales	Atheliaceae	Piloderma	Piloderma byssinum	Pilbys	Ectomycorrhizal	JGI Mycocosm 1KFG project
Agaricomycetes	Atheliales	Atheliaceae	Fibulorhizoctonia	Fibulorhizoctonia psychrophila	Fibsp	Litter decayer	Nagy et al., 2016
Agaricomycetes	Boletales	Serpulaceae	Serpula	Serpula lacrymans	SerlaS	Brown-rot	Eastwood et al., 2011
Agaricomycetes	Boletales	Coniophraceae	Coniophora	Coniophora puteana	Conpu	Brown-rot	Floudas et al., 2012
Agaricomycetes	Boletales	Hygrophoropsidaceae	Leucogyrophana	Leucogyrophana mollusca	Leumo	Wood decayer	Wu et al., 2022
Agaricomycetes	Boletales	Hygrophoropsidaceae	Hygrophoropsis	Hygrophoropsis aurantiaca	Hygaur	Brown-rot	Wu et al., 2022
Agaricomycetes	Boletales	Suillaceae	Suillus	Suillus paluster	Suipal	Ectomycorrhizal	Lofgren et al., 2021
Agaricomycetes	Boletales	Suillaceae	Suillus	Suillus ampliporus	Suiamp	Ectomycorrhizal	Lofgren et al., 2021
Agaricomycetes	Boletales	Suillaceae	Suillus	Suillus clintonianus	Suicli	Ectomycorrhizal	Lofgren et al., 2021
Agaricomycetes	Boletales	Suillaceae	Suillus	Suillus lakei	Suilak	Ectomycorrhizal	Lofgren et al., 2021
Agaricomycetes	Boletales	Suillaceae	Suillus	Suillus placidus	Suipla	Ectomycorrhizal	Lofgren et al., 2021
Agaricomycetes	Boletales	Suillaceae	Suillus	Suillus weaverae	Suigr	Ectomycorrhizal	Lofgren et al., 2021
Agaricomycetes	Boletales	Suillaceae	Suillus	Suillus occidentalis	Suiocc	Ectomycorrhizal	Lofgren et al., 2021
Agaricomycetes	Boletales	Suillaceae	Suillus	Suillus luteus	Suilu	Ectomycorrhizal	Kohler et al., 2015
Agaricomycetes	Boletales	Suillaceae	Suillus	Suillus brevipes	Suibr	Ectomycorrhizal	Branco et al., 2015
Agaricomycetes	Boletales	Suillaceae	Suillus	Suillus plorans	Suiplo	Ectomycorrhizal	Lofgren et al., 2021
Agaricomycetes	Boletales	Suillaceae	Suillus	Suillus variegatus	Suivar	Ectomycorrhizal	Lofgren et al., 2021
Agaricomycetes	Boletales	Suillaceae	Suillus	Suillus tomentosus	Suitom	Ectomycorrhizal	Lofgren et al., 2021
Agaricomycetes	Boletales	Suillaceae	Suillus	Suillus hirtellus	Suihi	Ectomycorrhizal	Lofgren et al., 2021
Agaricomycetes	Boletales	Suillaceae	Suillus	Suillus fuscotomentosus	Suifus	Ectomycorrhizal	Lofgren et al., 2021
Agaricomycetes	Boletales	Suillaceae	Suillus	Suillus discolor	Suidis	Ectomycorrhizal	Lofgren et al., 2021
Agaricomycetes	Boletales	Suillaceae	Suillus	Suillus bovinus	Suibov	Ectomycorrhizal	Lofgren et al., 2021
Agaricomycetes	Boletales	Suillaceae	Suillus	Suillus spraguei	Suipic	Ectomycorrhizal	Lofgren et al., 2021
Agaricomycetes	Boletales	Suillaceae	Suillus	Suillus decipiens	Suidec	Ectomycorrhizal	Lofgren et al., 2021
Agaricomycetes	Boletales	Suillaceae	Suillus	Suillus cothurnatus	Suicot	Ectomycorrhizal	Lofgren et al., 2021
Agaricomycetes	Boletales	Suillaceae	Suillus	Suillus subaureus	Suisub	Ectomycorrhizal	Lofgren et al., 2021
Agaricomycetes	Boletales	Suillaceae	Suillus	Suillus cf. subluteus	Suisubl	Ectomycorrhizal	Lofgren et al., 2021
Agaricomycetes	Boletales	Suillaceae	Suillus	Suillus subalutaceus	Suisu	Ectomycorrhizal	Lofgren et al., 2021
Agaricomycetes	Boletales	Suillaceae	Suillus	Suillus americanus	Suiame	Ectomycorrhizal	Lofgren et al., 2021
Agaricomycetes	Boletales	Rhizopogonaceae	Rhizopogon	Rhizopogon vinicolor	Rhivi	Ectomycorrhizal	Mujic et al., 2017
Agaricomycetes	Boletales	Rhizopogonaceae	Rhizopogon	Rhizopogon vesiculosus	Rhives	Ectomycorrhizal	Mujic et al., 2017
Agaricomycetes	Boletales	Sclerodermataceae	Scleroderma	Scleroderma citrinum	Sclci	Ectomycorrhizal	Kohler et al., 2015
Agaricomycetes	Boletales	Sclerodermataceae	Pisolithus	Pisolithus tinctorius	Pisti	Ectomycorrhizal	Kohler et al., 2015
Agaricomycetes	Boletales	Sclerodermataceae	Pisolithus	Pisolithus microcarpus	Pismi	Ectomycorrhizal	Kohler et al., 2015
Agaricomycetes	Boletales	Boletinellaceae	Phlebopus	Phlebopus sp.	PhlFC	Ectomycorrhizal	Wu et al., 2022
Agaricomycetes	Boletales	Melanogastraceae	Melanogaster	Melanogaster broomeianus	Melbro	Ectomycorrhizal	Miyauchi et al., 2020
Agaricomycetes	Boletales	Paxillaceae	Paxillus	Paxillus adelphus	Paxru	Ectomycorrhizal	Kohler et al., 2015
Agaricomycetes	Boletales	Paxillaceae	Paxillus	Paxillus involutus	Paxin	Ectomycorrhizal	Kohler et al., 2015
Agaricomycetes	Boletales	Paxillaceae	Paxillus	Paxillus ammoniavirescens	Paxam	Ectomycorrhizal	Miyauchi et al., 2020
Agaricomycetes	Boletales	Paxillaceae	Gyrodon	Gyrodon lividus	Gyrli	Ectomycorrhizal	Miyauchi et al., 2020
Agaricomycetes	Boletales	Boletaceae	Xerocomus	Xerocomus badius	Xerba	Ectomycorrhizal	Miyauchi et al., 2020
Agaricomycetes	Boletales	Boletaceae	Boletus	Boletus edulis	Boled	Ectomycorrhizal	Miyauchi et al., 2020
Agaricomycetes	Thelephorales	Thelephoraceae	Thelephora	Thelephora terrestris	Theter	Ectomycorrhizal	Miyauchi et al., 2020
Agaricomycetes	Thelephorales	Thelephoraceae	Thelephora	Thelephora ganbajun	Thega	Ectomycorrhizal	Miyauchi et al., 2020
Agaricomycetes	Polyporales	Meruliaceae	Phlebia	Phlebia brevispora	Phlbr	White-rot	Binder et al., 2013
Agaricomycetes	Russulales	Bondarzewiaceae	Heterobasidion	Heterobasidion annosum	Hetan	Pathogen	Olson et al., 2012
Agaricomycetes	Russulales	Russulaceae	Multifurca	Multifurca ochricompacta	Muloch	Ectomycorrhizal	Looney et al., 2022
Agaricomycetes	Russulales	Russulaceae	Russula	Russula vinacea	Rusvin	Ectomycorrhizal	Looney et al., 2022
Agaricomycetes	Russulales	Russulaceae	Russula	Russula ochroleuca	Rusoch	Ectomycorrhizal	Miyauchi et al., 2020
Agaricomycetes	Russulales	Russulaceae	Russula	Russula rugulosa	Rusrug	Ectomycorrhizal	Looney et al., 2022
Agaricomycetes	Russulales	Russulaceae	Russula	Russula emetica	Ruseme	Ectomycorrhizal	Miyauchi et al., 2020
Agaricomycetes	Russulales	Russulaceae	Russula	Russula compacta	Ruscom	Ectomycorrhizal	Looney et al., 2022
Agaricomycetes	Russulales	Russulaceae	Russula	Russula dissimulans	Rusdis	Ectomycorrhizal	Looney et al., 2022
Agaricomycetes	Russulales	Russulaceae	Russula	Russula brevipes	Rusbre	Ectomycorrhizal	Looney et al., 2022
Agaricomycetes	Russulales	Russulaceae	Lactifluus	Lactifluus cf. volemus	Lacvol	Ectomycorrhizal	Looney et al., 2022
Agaricomycetes	Russulales	Russulaceae	Lactifluus	Lactifluus cf. subvellereus	Lacsub	Ectomycorrhizal	Looney et al., 2022
Agaricomycetes	Russulales	Russulaceae	Lactaria	Lactarius quietus	Lacqui	Ectomycorrhizal	Miyauchi et al., 2020
Agaricomycetes	Russulales	Russulaceae	Lactaria	Lactarius psammicola	Lacpsa	Ectomycorrhizal	Looney et al., 2022
Agaricomycetes	Russulales	Russulaceae	Lactaria	Lactarius indigo	Lacind	Ectomycorrhizal	Looney et al., 2022
Agaricomycetes	Russulales	Russulaceae	Lactaria	Lactarius vividus	Lacviv	Ectomycorrhizal	Lebreton et al., 2022
Agaricomycetes	Russulales	Russulaceae	Lactaria	Lactarius sanguifluus	Lacsan	Ectomycorrhizal	Lebreton et al., 2022
Agaricomycetes	Russulales	Russulaceae	Lactaria	Lactarius hatsudake	Lachat	Ectomycorrhizal	Lebreton et al., 2022
Agaricomycetes	Russulales	Russulaceae	Lactaria	Lactarius deliciosus	Lacdel	Ectomycorrhizal	Lebreton et al., 2022
Agaricomycetes	Russulales	Russulaceae	Lactaria	Lactarius pseudohatsudake	Lacpse	Ectomycorrhizal	Lebreton et al., 2022
Agaricomycetes	Russulales	Russulaceae	Lactaria	Lactarius hengduanensis	Lachen	Ectomycorrhizal	Lebreton et al., 2022
Agaricomycetes	Russulales	Russulaceae	Lactaria	Lactarius akahatsu	Lacaka	Ectomycorrhizal	Lebreton et al., 2022
Agaricomycetes	Russulales	Russulaceae	Gloeopeniophorella	Gloeopeniophorella convolvens	Glocon	White-rot	Looney et al., 2022
Agaricomycetes	Russulales	Auriscalpiaceae	Artomyces	Artomyces pyxidatus	Clapy	Wood decayer	Looney et al., 2022
Agaricomycetes	Russulales	Auriscalpiaceae	Auriscalpium	Auriscalpium vulgare	Aurvu	Litter decayer	Looney et al., 2022
Agaricomycetes	Russulales	Lachnocladiaceae	Vararia	Vararia minispora	Varmin	White-rot	Looney et al., 2022
Agaricomycetes	Russulales	Amylostereaceae	Amylostereum	Amylostereum chailletii	Amycha	White-rot	Looney et al., 2022
Agaricomycetes	Trechisporales	Hydnodontaceae	Sistotremastrum	Sistotremastrum niveocremeum	Sisni	Wood decayer	Nagy et al., 2016
Agaricomycetes	Geastrales	Geastraceae	Sphaerobolus	Sphaerobolus stellatus	Sphst	Litter decayer	Kohler et al., 2015
Agaricomycetes	Gomphales	Gomphaceae	Ramaria	Ramaria rubella (R. acris)	Ramac	Wood decayer	Miyauchi et al., 2020
Agaricomycetes	Gomphales	Gomphaceae	Gautieria	Gautieria morchelliformis	Gaumor	Ectomycorrhizal	Miyauchi et al., 2020
Agaricomycetes	Auriculariales	Auriculariaceae	Auricularia	Auricularia subglabra	Aurde	White-rot	Floudas et al., 2012
Agaricomycetes	Cantharellales	Tulasnellaceae	Tulasnella	Tulasnella calospora	Tulca	Orchid mycorrhizal	Kohler et al., 2015
Agaricomycetes	Cantharellales	Ceratobasidiaceae	Rhizoctonia	Rhizoctonia solani AG-3	Rhisol	Orchid mycorrhizal	Cubeta et al., 2014
Agaricomycetes	Cantharellales	Ceratobasidiaceae	Rhizoctonia	Rhizoctonia solani AG-1 IB	Rhiso	Orchid mycorrhizal	Wibberg et al., 2013
Agaricomycetes	Cantharellales	Ceratobasidiaceae	Ceratobasidium	Ceratobasidium sp. anastomosis	CerAGI	Orchid mycorrhizal	Miyauchi et al., 2020
Agaricomycetes	Cantharellales	Hydnaceae	Sistotrema	Sistotrema sp. PMI_390	ClaPMI	Brown-rot	Miyauchi et al., 2020
Agaricomycetes	Cantharellales	Hydnaceae	Hydnum	Hydnum rufescens	Hydru	Ectomycorrhizal	Miyauchi et al., 2020
Agaricomycetes	Cantharellales	Cantarellaceae	Cantarellus	Cantharellus anzutake	Cananz	Ectomycorrhizal	Miyauchi et al., 2020
Agaricomycetes	Cantharellales	Botryobasidiaceae	Botryobasidium	Botryobasidium botryosum	Botbo	Brown-rot	Riley et al., 2014
Agaricomycetes	Sebacinales	Sebacinaceae	Sebacina	Sebacina vermifera	Sebve	Orchid mycorrhizal	Kohler et al., 2015
Agaricomycetes	Sebacinales	Serendipitaceae	Piriformospora	Piriformospora indica	Pirin	Orchid mycorrhizal	Zuccaro et al., 2011
Dacrymycetes	Dacrymycetales	Dacrymycetaceae	Dacryopinax	Dacryopinax primogenitus	Dacsp	Brown-rot	Floudas et al., 2012

## Sheet: Table S2
Table S2 – List of 173 transporter gene families present in the full dataset of 108 Agaricomycotina taxa. Transporter Classification Database (TCDB) ID and family names are indicated, as is transporter gene family presence in the 28 taxa partial family dataset, their presence at the root of the full and partial family datasets as calculated by CAFE5, whether they are significantly expanding and/o…
Transporter Classification DataBase ID	Family Name	Base Cation Transporter Family (Y/N/accessory to base cation transport)	Present at the root of the 108 tree (Y/N)	Significantly expanding and/or contracting in 108 tree (Y/N)	Present in 28a dataset (Y/N)	Present at the root of the 28a tree (Y/N)	Significantly expanding and/or contractingin 28a tree (Y/N)
1.A.1	The Voltage-gated Ion Channel (VIC) Superfamily	Y	Y	N	Y	Y	N
1.A.4	The Transient Receptor Potential Ca2+/Cation Channel (TRP-CC) Family	Y	Y	N	Y	Y	Y
1.A.6	The Epithelial Na+ Channel (ENaC) Family	Y	Y	N	Y	Y	N
1.A.8	The Major Intrinsic Aquaporin Protein, (MIP) Family	Y	Y	N	Y	Y	N
1.A.9	The Neurotransmitter Receptor, Cys loop, Ligand-gated Ion Channel (LIC) Family	Y	Y	N	Y	Y	N
1.A.11	The Ammonium Channel Transporter (Amt) Family	N	Y	N	Y	Y	N
1.A.12	The Intracellular Chloride Channel (CLIC) Family	N	N	N	Y	Y	N
1.A.15	The Non-selective Cation Channel-2 (NSCC2) Family	Y	Y	N	Y	Y	N
1.A.16	The Formate-Nitrite Transporter (FNT) Family	N	N	N	N	N/A	N/A
1.A.17	The Calcium-dependent Chloride Channel (Ca-ClC) Family	Y	Y	N	Y	Y	N
1.A.22	The Large Conductance Mechanosensitive Ion Channel (MscL) Family	Y	N	N	N	N/A	N/A
1.A.24	The Gap Junction-forming Connexin (Connexin) Family	N	Y	N	Y	Y	N
1.A.26	The Mg2+ Transporter-E (MgtE) Family	Y	Y	Y	Y	Y	Y
1.A.30	The H+- or Na+-translocating Bacterial Flagellar Motor/ExbBD Outer Membrane Transport Energizer (Mot-Exb) Superfamily	Y	N	N	N	N/A	N/A
1.A.31	The Annexin (Annexin) Family	Y	Y	N	N	N/A	N/A
1.A.33	The Cation Channel-forming Heat Shock Protein-70 (Hsp70) Family	Y	Y	Y	Y	Y	Y
1.A.35	The CorA/Mrs2 Metal Ion Transporter (MIT) Family	Y	Y	N	Y	Y	N
1.A.38	The Golgi pH Regulator (GPHR) Family	N	Y	N	Y	Y	N
1.A.47	The Nucleotide-sensitive Anion-selective Channel, ICln (ICln) Family	N	N	N	Y	Y	N
1.A.51	The Voltage-gated Proton Channel (VPC) Family	N	N	N	Y	Y	N
1.A.56	The Copper Transporter (Ctr) Family	Y	Y	N	Y	Y	N
1.A.67	The Membrane Mg2+ Transporter (MMgT) Family	Y	N	N	Y	Y	N
1.B.8	The Mitochondrial and Plastid Porin (MPP) Family	N	Y	N	Y	Y	N
1.B.12	The Autotransporter-1 (AT-1) Family	N	Y	N	Y	Y	N
1.B.33	The Outer Membrane Protein Insertion Porin (Bam Complex) (OmpIP) Family	N	Y	N	Y	Y	N
1.B.40	The Autotransporter-2 (AT-2) Family	N	N	N	Y	N	N
1.C.4	The Aerolysin Channel-forming Toxin (Aerolysin) Family	N	N	N	N	N/A	N/A
1.C.11	The Pore-forming RTX Toxin (RTX-toxin) Family	N	N	N	Y	N	N
1.C.13	The Channel-forming Leukocidin Cytotoxin (Ctx) Family	Y	N	N	N	N/A	N/A
1.C.33	The Cathelicidin (Cathelicidin) Family	N	N	N	Y	N	N
1.C.39	The Membrane Attack Complex/Perforin (MACPF) Family	N	N	N	Y	Y	N
1.C.47	The Insect/Fungal Defensin (Insect/Fungal Defensin) Family	Y	N	N	N	N/A	N/A
1.C.57	The Clostridial Cytotoxin (CCT) Family	Y	N	N	Y	Y	N
1.C.63	The Pseudopleuronectes americanus (flounder) Pleurocidin (Pleurocidin) Family	N	N	N	Y	Y	N
1.C.71	The Cytolytic Delta Endotoxin (Cyt1/2) Family	Y	N	N	N	N/A	N/A
1.C.82	The Pore-forming Amphipathic Helical Peptide HP(2-20) (HP2-20) Family	N	Y	N	Y	Y	N
1.C.96	The Haemolytic Lectin, CEL-III (CEL-III) Family	N	N	N	N	N/A	N/A
1.C.97	The Pleurotolysin Pore-Forming (Pleurotolysin) Family	N	N	N	Y	N	N
1.F.1	The Synaptosomal Vesicle Fusion Pore (SVF-Pore) Family	N	Y	N	Y	Y	N
1.G.7	The Reovirus FAST Fusion Protein (R-FAST) Family	N	N	N	Y	N	N
2.A.1	The Major Facilitator Superfamily (MFS)	Y	Y	Y	Y	Y	Y
2.A.2	The Glycoside-Pentoside-Hexuronide (GPH):Cation Symporter Family	Y	Y	N	Y	Y	N
2.A.3	The Amino Acid-Polyamine-Organocation (APC) Superfamily	Y	Y	N	Y	Y	Y
2.A.4	The Cation Diffusion Facilitator (CDF) Family	Y	Y	N	Y	Y	N
2.A.5	The Zinc (Zn2+)-Iron (Fe2+) Permease (ZIP) Family	Y	Y	N	Y	Y	N
2.A.6	The Resistance-Nodulation-Cell Division (RND) Superfamily	Y	Y	N	Y	Y	N
2.A.7	The Drug/Metabolite Transporter (DMT) Superfamily	Y	Y	N	Y	Y	N
2.A.9	The Membrane Protein Insertase (YidC/Alb3/Oxa1) Family	N	Y	N	Y	Y	N
2.A.16	The Tellurite-resistance/Dicarboxylate Transporter (TDT) Family	N	Y	N	Y	Y	Y
2.A.17	The Proton-dependent Oligopeptide Transporter (POT/PTR) Family	N	Y	N	Y	Y	N
2.A.18	The Amino Acid/Auxin Permease (AAAP) Family	N	Y	N	Y	Y	N
2.A.19	The Ca2+:Cation Antiporter (CaCA) Family	Y	Y	N	Y	Y	N
2.A.20	The Inorganic Phosphate Transporter (PiT) Family	N	N	N	N	N/A	N/A
2.A.21	The Solute:Sodium Symporter (SSS) Family	Y	N	N	Y	Y	N
2.A.29	The Mitochondrial Carrier (MC) Family	N	Y	N	Y	Y	N
2.A.31	The Anion Exchanger (AE) Family	N	Y	N	Y	Y	N
2.A.36	The Monovalent Cation:Proton Antiporter-1 (CPA1) Family	Y	Y	N	Y	Y	N
2.A.37	The Monovalent Cation:Proton Antiporter-2 (CPA2) Family	Y	Y	N	Y	Y	N
2.A.38	The K+ Transporter (Trk) Family	Y	Y	N	Y	Y	N
2.A.39	The Nucleobase:Cation Symporter-1 (NCS1) Family	Y	Y	N	Y	Y	Y
2.A.40	The Nucleobase/Ascorbate Transporter (NAT) or Nucleobase:Cation Symporter-2 (NCS2) Family	N	N	N	Y	Y	N
2.A.41	The Concentrative Nucleoside Transporter (CNT) Family	N	Y	N	Y	Y	N
2.A.43	The Lysosomal Cystine Transporter (LCT) Family	N	Y	N	Y	Y	N
2.A.44	Undefined	N/A	N	N	Y	Y	N
2.A.45	The Arsenite-Antimonite (ArsB) Efflux Family	N	N	N	N	N/A	N/A
2.A.47	The Divalent Anion:Na+ Symporter (DASS) Family	N	Y	N	Y	Y	N
2.A.49	The Chloride Carrier/Channel (ClC) Family	N	Y	N	Y	Y	N
2.A.50	The Glycerol Uptake (GUP) or Membrane-bound Acyl Transferase (MBOAT) Family	N	Y	N	Y	Y	N
2.A.51	The Chromate Ion Transporter (CHR) Family	N	N	N	Y	N	N
2.A.52	The Ni2+-Co2+ Transporter (NiCoT) Family	Y	Y	N	Y	N	N
2.A.53	The Sulfate Permease (SulP) Family	N	Y	N	Y	Y	N
2.A.54	The Sideroflexin (SFXN) Family (formerly the Mitochondrial Tricarboxylate Carrier (MTC) Family)	N	Y	N	N	N/A	N/A
2.A.55	The Metal Ion (Mn2+-iron) Transporter (Nramp) Family	Y	Y	N	Y	Y	N
2.A.56	The Tripartite ATP-independent Periplasmic Transporter (TRAP-T) Family	N	N	N	N	N/A	N/A
2.A.57	The Equilibrative Nucleoside Transporter (ENT) Family	N	Y	N	Y	Y	N
2.A.59	The Arsenical Resistance-3 (ACR3) Family	N	N	N	Y	Y	N
2.A.66	The Multidrug/Oligosaccharidyl-lipid/Polysaccharide (MOP) Flippase Superfamily	N	Y	N	Y	Y	N
2.A.67	The Oligopeptide Transporter (OPT) Family	Y	Y	N	Y	Y	Y
2.A.72	The K+ Uptake Permease (KUP) Family	Y	Y	N	N	N/A	N/A
2.A.77	The Cadmium Resistance (CadD) Family	Y	N	N	Y	N	N
2.A.82	The Organic Solute Transporter (OST) Family	N	N	N	Y	N	N
2.A.85	The Aromatic Acid Exporter (ArAE) Family	N	Y	Y	Y	Y	N
2.A.89	The Vacuolar Iron Transporter (VIT) Family	Y	Y	N	Y	Y	N
2.A.92	The Choline Transporter-like (CTL) Family	N	N	N	Y	Y	N
2.A.93	Undefined	N/A	N	N	N	N/A	N/A
2.A.94	The Phosphate Permease (Pho1) Family	N	Y	N	Y	Y	N
2.A.96	The Acetate Uptake Transporter (AceTr) Family	N	Y	N	Y	Y	N
2.A.97	The Mitochondrial Inner Membrane K+/H+ and Ca2+/H+ Exchanger (LetM1) Family	Y	Y	N	Y	Y	N
2.A.100	The Ferroportin (Fpn) Family	Y	N	N	Y	Y	N
3.A.1	The ATP-binding Cassette (ABC) Superfamily	Y	Y	Y	Y	Y	Y
3.A.2	The H+- or Na+-translocating F-type, V-type and A-type ATPase (F-ATPase) Superfamily	Y	Y	Y	Y	Y	N
3.A.3	The P-type ATPase (P-ATPase) Superfamily	Y	Y	Y	Y	Y	Y
3.A.4	The Arsenite-Antimonite (ArsAB) Efflux Family	N	N	N	N	N/A	N/A
3.A.5	The General Secretory Pathway (Sec) Family	N	Y	N	Y	Y	N
3.A.6	The Type III (Virulence-related) Secretory Pathway (IIISP) Family	N	N	N	Y	N	N
3.A.7	The Type IV (Conjugal DNA-Protein Transfer or VirB) Secretory Pathway (IVSP) Family	N	Y	N	Y	Y	N
3.A.8	The Mitochondrial Protein Translocase (MPT) Family	N	Y	N	Y	Y	N
3.A.9	The Chloroplast Envelope Protein Translocase (CEPT or Tic-Toc) Family	N	Y	Y	Y	Y	N
3.A.16	The Endoplasmic Reticular Retrotranslocon (ER-RT or ERAD) Family	N	Y	N	Y	Y	N
3.A.17	The Phage T7 Injectisome (T7 Injectisome) Family	N	Y	N	Y	Y	N
3.A.18	The Nuclear mRNA Exporter (mRNA-E) Family	N	Y	N	Y	Y	N
3.A.19	The Guided Entry of Tail Anchored Protein (GET) Family, formerly the TMS Recognition/Insertion Complex (TRC) Family	N	Y	N	Y	Y	N
3.A.20	The Peroxisomal Protein Importer (PPI) Family	N	Y	Y	Y	Y	Y
3.B.1	The Na+-transporting Carboxylic Acid Decarboxylase (NaT-DC) Family	Y	Y	N	Y	Y	N
3.D.1	The H+ or Na+-translocating NADH Dehydrogenase (NDH) Family	Y	Y	N	Y	Y	N
3.D.2	The Proton-translocating Transhydrogenase (PTH) Family	N	Y	N	Y	Y	N
3.D.3	The Proton-translocating Quinol:Cytochrome c Reductase (QCR) Superfamily	N	Y	N	Y	Y	N
3.D.4	The Proton-translocating Cytochrome Oxidase (COX) Superfamily	N	Y	N	Y	Y	N
3.D.5	The Na+-translocating NADH:Quinone Dehydrogenase (Na-NDH or NQR) Family	Y	Y	N	Y	Y	N
3.E.1	The Ion-translocating Microbial Rhodopsin (MR) Family	Y	Y	N	Y	N	N
3.E.2	The Photosynthetic Reaction Center (PRC) Family	N	N	N	N	N/A	N/A
4.C.1	The Fatty Acid Group Translocation (FAT) Family	N	Y	N	Y	Y	Y
4.C.2	The Carnitine O-Acyl Transferase (CarAT) Family	N	Y	N	Y	Y	N
4.C.3	The Acyl-CoA Thioesterase (ACoT) Family	N	N	N	Y	N	N
5.A.1	The Disulfide Bond Oxidoreductase D (DsbD) Family	N	N	N	N	N/A	N/A
5.A.4	Undefined	N/A	Y	N	Y	Y	N
5.B.1	The gp91phox Phagocyte NADPH Oxidase-associated Cytochrome b558 (Phox) Family	Y	Y	N	Y	Y	Y
5.B.2	The Eukaryotic Cytochrome b561 (Cytb561) Family	N	N	N	N	N/A	N/A
8.A.5	The Voltage-gated K+ Channel β-subunit (Kvβ) Family	accessory to base cation transport	Y	N	Y	Y	Y
8.A.6	The Auxiliary Nutrient Transporter (ANT) Family	N	N	N	N	N/A	N/A
8.A.9	The rBAT Transport Accessory Protein (rBAT) Family	N	Y	N	Y	Y	N
8.A.11	The Immunophilin-like Prolyl:Peptidyl Isomerase Regulator (I-PPI) Family	N	Y	N	Y	Y	N
8.A.13	The Tetratricopeptide Repeat (Tpr1) Family	N	Y	N	Y	Y	N
8.A.15	The K+ Channel Accessory Protein (KChAP) Family	accessory to base cation transport	N	N	Y	N	N
8.A.21	The Stomatin/Podocin/Band 7/Nephrosis.2/SPFH (Stomatin) Family	N	N	N	Y	Y	N
8.A.27	The CDC50 P-type ATPase Lipid Flippase β-Subunit (CDC50) Family	N	Y	N	Y	Y	N
8.A.28	The Ankyrin (Ankyrin) Family	accessory to base cation transport	Y	Y	Y	Y	Y
8.A.30	The Nedd4-Family Interacting Protein-2 (Nedd4) Family	accessory to base cation transport	Y	N	Y	Y	N
8.A.32	The β-Amyloid Cleaving Enzyme 1 (BACE1) Family	Y	Y	Y	Y	Y	Y
8.A.34	The Endophilin (Endophilin) Family	accessory to base cation transport	Y	N	Y	Y	N
8.B.9	The Triflin Toxin (Triflin or CRISP) Family	N	N	N	Y	Y	N
9.A.1	The Non ABC Multidrug Exporter (N-MDE) Family	N	N	N	Y	N	N
9.A.2	The Putative Dissolved Inorganic Carbon Concentrating Transporter (DIC-CT) Family	N	Y	N	Y	Y	N
9.A.6	The ATP Exporter (ATP-E) Family	N	N	N	Y	Y	N
9.A.10	The Oligomeric Probable Pore-forming SpoIIA Toxin (SpoIIA) Family	N	Y	Y	Y	Y	Y
9.A.14	The G-protein-coupled receptor (GPCR) Family	Y	Y	N	Y	Y	Y
9.A.17	The Integral Membrane Peroxisomal Protein Importer-2 (PPI2) Family	N	Y	N	Y	Y	N
9.A.19	The Lipid Intermediate Transporter (Arv1) Family	N	Y	N	Y	Y	N
9.A.25	Undefined	N/A	N	N	Y	N	N
9.A.26	The Lipid-translocating Exporter (LTE) Family	N	Y	N	Y	Y	N
9.A.27	The Non-Classical Protein Exporter (NCPE) Family	N	N	N	Y	N	N
9.A.34	The Nuclear Pore Complex Biogenesis (NPC-B) Family	N	Y	N	Y	Y	Y
9.A.36	The Ca2+-dependent Phospholipid Scramblase (Scramblase) Family	N	Y	N	Y	N	N
9.A.40	Undefined	N/A	Y	N	Y	Y	N
9.A.45	The Archaeocin/Halocin C8 (HalC8) Family	N	Y	N	Y	Y	N
9.A.48	The Unconventional Protein Secretion (UPS) System Family	N	N	N	N	N/A	N/A
9.A.50	The Nuclear t-RNA Exporter (tRNA-E) Family	N	Y	N	Y	Y	N
9.A.55	The TMEM205 (TMEM205) Family	N	Y	N	Y	Y	N
9.B.1	The Integral Membrane CAAX Protease (CAAX Protease) Family	N	Y	N	Y	Y	N
9.B.7	Undefined	N/A	Y	N	N	N/A	N/A
9.B.10	The Putative Tripartite Zn2 Transporter (TZT) Family	Y	Y	N	Y	Y	N
9.B.12	The Sensitivity to Sodium or Salt Stress-induced Hydrophobic Peptide (Sna) Family	N	N	N	Y	Y	Y
9.B.16	The Ductin Channel (Ductin) Family	N	N	N	N	N/A	N/A
9.B.17	The VAMP-associated protein (VAP) Family	N	N	N	N	N/A	N/A
9.B.21	The Frataxin (Frataxin) Family	accessory to base cation transport	Y	N	Y	Y	N
9.B.24	Undefined	N/A	Y	N	Y	Y	N
9.B.25	Undefined	N/A	Y	N	Y	Y	N
9.B.26	The Regulator of ER Stress and Autophagy TMEM208 (TMEM208) Family	N	Y	N	Y	Y	N
9.B.27	The Death Effector Domain A (DedA) Family	N	Y	N	Y	Y	N
9.B.32	The DUF3302 or Pfam11742 (YibI) Family	N	N	N	Y	Y	N
9.B.34	The Kinase/Phosphatase/Cyclic-GMP Synthase/Cyclic di-GMP Hydrolase (KPSH) Family	N	N	N	Y	N	N
9.B.35	The Putative Thyroxine-Transporting Transthyretin (Transthyretin) Family	N	Y	N	Y	Y	N
9.B.37	Undefined	N/A	N	N	Y	Y	N
9.B.38	The Myelin Proteolipid Protein (MPLP) Family	N	N	N	Y	N	N
9.B.45	The Fungal Mating-type Pheromone Receptor (MAT-PR) Family	N	Y	Y	Y	Y	Y
9.B.70	The Multicomponent Putative SpoIIIAE Exporter (SpoIIIA-E) Family	N	N	N	N	N/A	N/A
9.B.74	Undefined	N/A	N	N	N	N/A	N/A
9.B.75	The Ethanol Utilization/Transport (Eut) Protein Family	N	N	N	N	N/A	N/A
9.B.82	The Endoplasmic Reticulum Retrieval Protein1 (Putative Heavy Metal Transporter) (Rer1) Family	Y	Y	N	Y	Y	N
9.B.87	The Selenoprotein P Receptor (SelP-Receptor) Family	N	N	N	Y	N	N
9.B.102	The YedE/YeeE (YeeE) Family	N	Y	N	Y	Y	N
9.B.103	The Putative Ca2+ Uniporter (GC1qR) Family	Y	Y	N	Y	Y	N
9.C.6	The Mitochondrial Organic Anion Channel (MOAC) Family	N	Y	N	Y	Y	N

## Sheet: Table S3
Table S3 – Count data of gene copy numbers of all 173 transporter gene families (indicated with Transporter Classification Database ID) present in each taxon of the 108 Agaricomycotina taxa present in the full dataset.
TCDB ID	Amanita muscaria	Amanita rubescens	Amanita thiersii	Amylostereum chailletii	Armillaria gallica	Auricularia subglabra	Auriscalpium vulgare	Boletus edulis	Botryobasidium botryosum	Cantharellus anzutake	Ceratobasidium sp.	Sistotrema sp.	Artomyces pyxidatus	Coniophora puteana	Coprinopsis cinera	Cortinarius glaucopus	Crucibulum laeve	Dacryopinax primogenitus	Fibulorhizoctonia psychrophila	Gautieria morchelliformis	Gloeopeniophorella convolvens	Gymnopus androsaceus	Gyrodon lividus	Hebeloma cylindrosporum	Heterobasidion annosum	Hydnum rufescens	Hygrophoropsis aurantiaca	Hypholoma sublateritium	Lactarius akahatsu	Laccaria amethystina	Laccaria bicolor	Lactarius deliciosus	Lactarius hatsudake	Lactarius hengduanensis	Lactarius indigo	Lactarius psammicola	Lactarius pseudohatsudake	Lactarius quietus	Lactarius sanguifluus	Lactifluus cf. subvellereus	Lactarius vividus	Lactifluus cf. volemus	Leucogyrophana mollusca	Melanogaster broomeianus	Multifurca ochricompacta	Omphalotus olearius	Paxillus ammoniavirescens	Paxillus involutus	Paxillus adelphus
1.A.1	4	4	3	4	3	2	3	4	6	8	8	6	3	2	4	3	4	4	5	18	2	9	2	4	1	4	2	6	6	3	4	8	6	8	8	2	10	6	6	3	4	2	2	3	4	1	2	2	2
1.A.4	6	4	5	5	12	5	6	7	19	3	4	3	2	2	7	6	5	2	5	22	4	7	2	5	2	4	4	5	11	3	3	17	9	14	13	9	20	6	5	6	7	8	5	4	4	5	13	24	5
1.A.6	1	1	1	1	2	1	1	1	2	1	2	2	1	1	2	1	1	1	2	1	1	3	1	1	1	1	1	2	1	1	2	1	1	1	1	1	1	1	1	1	1	1	1	1	2	2	1	1	1
1.A.8	7	9	5	6	5	5	8	3	19	7	6	9	8	6	2	8	6	5	9	5	4	6	4	6	3	6	4	4	7	7	8	7	8	8	11	11	7	7	7	8	8	6	7	3	4	3	4	4	4
1.A.9	1	1	1	1	1	2	1	2	1	1	1	1	1	1	1	1	1	3	1	0	1	1	1	1	1	1	1	1	1	1	1	1	1	1	2	1	1	1	1	1	1	1	1	1	1	0	1	1	1
1.A.11	2	4	2	2	5	4	2	4	3	3	2	4	2	2	4	3	3	3	14	6	2	6	2	4	2	8	2	3	1	7	8	1	1	1	1	1	1	1	2	2	1	2	2	2	1	3	2	2	2
1.A.12	3	2	2	1	2	3	3	5	0	0	4	3	2	16	3	4	3	2	6	2	3	3	6	2	4	0	10	4	1	1	1	4	5	3	2	1	1	0	0	1	7	4	4	2	1	0	5	6	5
1.A.15	1	1	1	1	1	2	1	1	1	1	1	1	1	1	1	1	1	1	1	1	0	1	1	1	1	1	1	1	1	1	1	1	1	1	1	1	1	1	1	1	1	1	1	1	1	1	1	1	1
1.A.16	0	0	0	0	1	0	1	0	0	2	0	0	0	0	1	0	0	1	1	0	0	1	1	0	0	0	0	1	0	0	1	0	0	0	0	1	0	0	0	0	0	1	0	1	0	0	0	0	0
1.A.17	0	0	0	1	1	1	1	3	1	1	1	2	1	0	1	1	0	1	2	1	1	2	1	1	1	1	1	1	1	0	1	1	1	1	1	1	3	1	1	1	1	1	1	1	1	0	1	2	1
1.A.22	0	0	0	0	0	1	0	0	0	0	0	0	0	0	1	1	1	1	2	0	0	1	0	1	0	0	0	1	0	0	0	0	0	0	0	0	0	0	0	0	0	0	0	0	0	0	0	0	0
1.A.24	1	1	1	1	1	1	1	1	1	1	1	1	1	1	1	2	1	1	1	1	1	1	1	1	1	1	1	1	1	1	1	1	1	1	1	1	1	2	1	1	1	1	1	1	1	0	1	1	1
1.A.26	35	128	19	20	50	146	16	35	197	119	150	158	12	39	13	23	36	41	130	32	12	60	25	20	24	46	28	23	15	21	36	14	15	10	15	13	13	22	12	11	12	17	41	112	13	9	67	108	38
1.A.30	0	0	0	0	0	0	1	0	0	0	0	0	0	0	0	0	0	0	0	0	0	0	0	0	0	0	0	0	0	0	0	0	0	0	0	0	0	0	0	0	0	0	0	0	0	0	0	0	0
1.A.31	0	0	1	0	1	0	0	0	0	2	0	0	0	0	3	1	1	0	0	1	0	3	0	1	0	0	0	1	0	1	0	0	0	1	0	0	0	0	0	0	0	0	0	0	0	3	0	0	0
1.A.33	10	34	6	7	8	16	9	7	13	14	25	11	13	13	7	9	8	8	20	18	7	18	7	8	9	15	17	10	7	9	10	22	19	21	16	13	16	13	11	7	6	6	8	19	6	7	7	7	6
1.A.35	1	4	1	3	1	3	2	2	1	1	2	1	2	2	1	1	1	2	1	1	1	1	1	1	3	2	2	1	2	2	2	1	1	2	2	2	2	2	2	2	2	2	2	2	2	1	1	2	2
1.A.38	1	1	1	1	1	1	1	1	0	1	1	1	1	1	0	1	1	1	1	1	1	1	0	1	2	2	1	1	1	1	1	1	1	1	1	1	1	3	1	1	2	1	1	1	1	0	1	1	1
1.A.47	0	0	0	0	1	1	0	0	0	0	0	0	0	1	1	0	1	1	0	1	0	0	0	0	0	1	1	0	0	0	1	1	1	1	0	0	1	0	0	1	0	1	0	1	0	0	1	1	1
1.A.51	1	0	0	0	1	1	1	0	0	0	0	0	1	0	0	0	1	1	1	0	1	1	1	1	1	0	0	0	1	0	0	1	0	1	0	0	0	0	0	0	0	1	0	0	1	1	0	0	0
1.A.56	2	2	2	3	3	5	3	4	2	2	3	3	2	3	4	3	3	2	4	1	3	3	3	2	4	2	2	3	2	3	2	4	4	3	5	4	3	3	3	4	3	4	3	3	3	1	3	3	3
1.A.67	0	0	1	1	1	1	1	1	1	0	1	0	1	1	0	1	1	1	1	1	0	0	1	1	1	0	1	1	1	1	0	2	1	3	2	1	1	1	1	1	1	0	1	1	0	1	1	0	1
1.B.8	1	1	1	1	1	1	1	1	2	2	1	1	1	1	1	1	1	1	1	1	1	1	1	1	1	1	1	1	1	1	1	2	2	1	1	1	1	2	1	3	1	1	1	1	1	1	1	2	1
1.B.12	1	3	1	1	1	4	2	1	2	1	1	1	1	1	2	2	2	1	3	1	1	1	1	1	1	1	2	1	1	1	1	1	1	3	1	1	2	1	2	1	2	1	2	1	1	0	1	1	1
1.B.33	2	2	2	2	2	2	1	2	1	1	1	1	2	2	1	1	1	2	2	2	1	1	1	1	1	1	1	1	1	1	1	1	1	1	2	1	1	1	1	2	1	2	1	2	2	1	2	1	1
1.B.40	0	0	0	0	0	0	0	0	0	0	0	0	0	0	0	0	0	0	0	0	0	0	0	0	0	3	0	0	0	0	0	0	0	0	0	0	0	0	0	0	0	0	0	0	0	0	0	0	0
1.C.4	0	2	0	1	3	0	4	3	0	0	0	0	1	0	2	2	0	0	1	0	2	0	0	0	0	0	0	0	0	0	0	0	0	0	0	0	0	0	0	0	0	0	0	0	0	0	0	0	0
1.C.11	0	0	0	0	0	0	0	0	0	0	0	0	0	0	0	0	0	0	0	0	0	0	0	0	0	0	0	0	0	0	0	0	0	0	0	0	0	0	0	0	0	0	0	0	0	0	0	0	0
1.C.13	0	0	0	0	0	0	0	0	0	0	0	0	0	0	0	0	0	0	0	0	0	0	0	0	0	0	0	0	0	0	0	0	0	0	0	0	0	0	0	0	0	0	0	0	0	0	0	0	0
1.C.33	0	0	0	0	0	0	0	0	0	0	0	0	0	0	0	0	0	0	0	0	0	0	0	0	0	0	0	0	0	0	0	0	0	0	0	0	0	0	0	0	0	0	0	0	0	0	0	0	0
1.C.39	1	0	0	0	0	0	0	4	0	0	4	4	10	0	1	1	0	0	0	0	0	0	0	0	0	0	2	1	0	0	0	0	0	0	0	0	0	0	0	0	0	0	0	0	0	0	0	0	0
1.C.47	0	1	1	0	0	0	0	0	0	0	0	0	0	0	0	0	0	0	0	0	0	0	0	0	0	0	0	0	0	1	1	0	0	0	0	0	0	0	0	0	0	0	0	0	0	0	0	0	0
1.C.57	1	0	1	0	1	2	0	0	1	1	0	0	0	0	1	0	2	1	1	0	0	0	0	1	0	1	0	0	0	1	2	0	0	0	0	0	0	0	0	0	0	0	0	0	0	0	0	1	0
1.C.63	1	0	0	0	12	0	0	0	5	1	0	0	0	0	2	2	1	1	2	1	0	1	0	1	1	0	0	2	2	1	1	6	2	1	1	0	6	0	0	0	2	0	0	0	0	1	0	0	0
1.C.71	0	0	0	0	6	0	0	0	0	0	7	0	0	0	0	3	0	0	0	0	0	0	0	0	0	0	0	0	0	0	0	0	0	0	0	0	0	0	0	0	0	0	0	0	0	0	0	0	0
1.C.82	0	0	0	0	1	0	1	1	1	0	0	1	0	1	0	0	0	1	1	1	0	0	1	0	0	1	1	1	1	0	0	1	1	1	0	1	1	1	1	1	1	2	1	0	1	0	1	1	1
1.C.96	0	0	0	0	0	0	0	0	0	0	0	0	0	0	0	0	0	0	0	0	0	0	0	1	0	0	0	0	0	1	0	0	0	0	0	0	0	0	0	0	0	0	0	0	0	0	0	0	0
1.C.97	0	4	0	0	0	0	0	0	4	0	2	1	0	0	0	0	0	0	2	0	0	0	1	0	2	0	23	2	0	2	0	0	0	0	0	0	0	0	0	3	0	0	15	1	0	0	1	2	1
1.F.1	6	6	5	4	6	6	4	6	5	5	5	7	4	5	6	5	4	4	5	6	6	6	5	5	4	3	4	4	6	5	5	5	7	5	5	9	4	5	7	4	5	5	5	5	5	2	5	5	4
1.G.7	0	0	0	0	0	2	0	0	0	0	0	0	0	0	0	0	0	0	0	0	0	0	0	0	0	0	0	0	0	0	0	0	1	0	0	0	0	0	0	0	0	0	0	0	0	0	0	0	0
2.A.1	121	98	120	160	263	182	179	181	153	99	161	192	182	195	102	154	174	220	323	166	126	294	135	118	139	93	177	141	118	96	110	149	139	115	134	115	147	138	139	65	120	85	184	224	102	115	191	240	132
2.A.2	3	3	3	2	3	4	3	4	3	4	4	3	3	3	3	3	3	3	6	2	3	5	2	3	3	4	3	3	3	3	3	3	4	3	2	2	3	4	3	2	3	2	3	2	3	3	3	2	3
2.A.3	23	27	14	24	37	29	25	30	26	18	16	20	34	36	14	20	32	19	35	26	21	39	26	19	19	30	31	32	18	24	27	17	21	17	24	17	19	18	16	17	16	19	29	33	18	18	38	52	30
2.A.4	3	3	3	1	8	4	3	2	5	9	2	5	2	4	4	4	2	3	3	3	2	5	2	5	2	3	4	6	1	4	7	1	1	1	2	1	2	2	1	2	2	1	3	4	2	3	3	3	2
2.A.5	5	3	3	3	5	7	4	4	3	4	3	3	5	3	4	4	3	4	3	4	3	4	3	3	3	3	3	4	6	4	5	4	3	3	4	4	4	4	3	4	4	3	3	5	3	3	4	4	6
2.A.6	2	1	1	1	2	2	1	2	1	2	2	1	1	3	1	1	1	2	1	2	1	11	1	1	1	1	1	1	1	3	2	1	1	1	1	1	1	1	1	1	1	1	1	2	1	0	1	2	2
2.A.7	20	22	17	18	18	24	16	16	17	22	18	23	18	15	15	18	17	20	21	20	16	20	17	15	17	23	17	16	18	20	19	22	18	18	18	17	18	20	18	18	16	19	19	19	13	16	16	16	18
2.A.9	2	2	2	1	3	1	2	1	2	2	1	1	2	2	2	2	2	1	5	1	2	0	2	3	1	2	2	2	1	2	2	3	2	2	2	2	2	2	2	1	2	1	2	2	2	0	2	2	2
2.A.16	8	6	2	11	13	8	16	7	11	22	9	8	8	5	6	9	8	4	11	6	8	10	4	5	11	8	7	10	8	2	7	12	7	5	3	12	7	12	5	4	2	3	13	9	3	3	3	7	7
2.A.17	1	3	2	3	5	6	1	2	4	5	2	1	1	2	2	1	3	3	2	3	1	2	1	2	1	1	1	3	1	2	3	1	1	1	1	2	1	1	1	1	1	4	1	4	1	2	1	1	1
2.A.18	6	8	4	7	5	11	7	7	5	5	4	6	8	9	4	4	6	8	17	7	5	8	6	3	6	4	8	6	4	4	3	4	4	3	4	6	4	4	4	4	4	4	10	5	5	4	5	4	7
2.A.19	5	8	8	6	10	7	5	5	6	7	9	5	5	5	4	4	5	7	11	7	4	11	4	5	7	8	5	4	10	3	5	13	20	10	9	7	24	8	7	10	11	4	7	4	3	4	5	7	5
2.A.20	0	0	0	0	1	1	0	0	1	0	1	0	0	0	3	0	0	0	0	0	0	0	0	0	0	0	0	0	0	0	0	0	0	0	0	0	0	0	0	0	0	0	0	0	0	0	0	0	0
2.A.21	2	1	0	2	3	3	3	9	1	1	1	1	3	6	1	2	3	4	4	6	1	4	4	1	3	1	5	4	1	2	2	1	1	1	1	1	1	1	1	1	1	1	6	3	1	3	3	5	2
2.A.29	34	40	34	35	33	33	32	37	35	39	37	34	34	33	32	36	36	33	46	36	39	38	34	35	32	33	32	34	40	35	39	43	40	36	37	39	43	36	36	32	33	34	32	37	31	28	33	39	34
2.A.31	1	1	1	1	1	1	1	2	1	1	1	1	1	1	1	2	1	1	1	1	1	1	1	1	1	1	1	1	2	1	3	3	1	2	1	1	1	1	1	1	1	1	1	1	0	0	3	2	3
2.A.36	9	8	4	3	6	5	5	4	3	2	6	6	5	2	1	6	3	2	4	5	5	3	3	4	5	3	4	4	7	4	6	12	7	6	6	5	11	4	7	4	6	5	4	3	3	3	3	3	3
2.A.37	2	1	2	4	2	3	2	1	3	3	3	2	2	2	4	3	3	1	3	2	2	4	3	2	2	3	3	3	3	1	2	3	2	3	6	2	3	1	2	3	1	2	3	2	2	3	2	4	2
2.A.38	2	2	4	2	4	2	3	1	5	2	1	3	2	1	2	2	2	2	1	3	2	2	0	1	5	1	2	2	6	3	2	6	5	4	3	2	3	1	5	2	4	2	1	1	2	2	1	0	0
2.A.39	5	4	4	10	13	4	5	7	5	2	4	6	8	6	3	10	6	9	12	12	4	20	8	7	7	6	16	9	7	5	8	6	9	7	5	4	7	6	9	3	11	2	16	9	8	9	7	10	5
2.A.40	1	2	1	2	1	1	1	1	1	0	2	1	1	1	1	1	2	1	2	4	1	1	1	1	1	1	1	2	1	1	1	1	1	1	1	1	1	1	1	0	1	0	1	1	1	1	1	2	1
2.A.41	1	1	1	4	1	2	1	1	2	1	1	2	2	2	1	1	1	3	1	2	1	10	1	2	2	6	1	2	2	2	1	1	1	1	1	8	2	9	1	1	1	2	1	1	1	1	1	1	1
2.A.43	2	1	2	1	2	1	1	1	4	2	2	3	1	1	1	2	1	2	2	1	1	2	1	1	1	2	1	3	1	1	1	1	1	1	3	1	2	1	1	1	1	1	1	0	1	2	1	1	1
2.A.44	3	0	1	1	1	2	1	1	0	0	5	0	1	1	0	1	1	0	1	1	1	2	1	1	1	0	1	1	1	0	0	1	1	1	1	1	1	2	1	1	1	2	1	1	1	0	1	1	1
2.A.45	0	0	0	0	0	0	0	0	0	0	0	0	0	0	0	0	0	0	0	0	0	0	0	0	0	0	0	0	0	0	0	0	0	0	0	0	0	0	0	0	0	0	0	0	0	0	0	0	0
2.A.47	1	1	1	1	1	1	1	1	1	1	1	1	1	1	1	1	1	1	1	1	1	1	1	1	1	2	1	1	1	1	1	1	1	1	2	1	1	1	1	1	1	1	1	1	1	1	1	2	1
2.A.49	3	3	3	3	4	2	3	3	3	3	3	3	4	2	4	3	3	2	3	3	3	3	2	3	3	3	2	4	3	3	3	4	3	3	9	3	5	5	4	20	3	3	2	2	3	3	2	2	1
2.A.50	1	1	1	1	1	1	1	1	1	1	1	1	1	1	1	1	1	1	1	1	0	2	1	1	1	1	1	1	1	1	1	5	2	1	4	1	3	2	3	1	1	10	1	1	4	1	1	1	1
2.A.51	1	0	1	0	0	0	0	0	0	0	0	0	0	0	0	0	0	0	0	0	0	0	0	2	0	4	0	0	0	1	3	0	0	0	0	0	0	0	0	0	0	0	0	0	0	0	0	0	0
2.A.52	1	1	1	1	1	1	1	1	1	2	0	1	1	0	1	1	1	1	1	1	1	1	1	1	1	1	0	1	1	1	2	1	1	1	1	1	0	1	0	1	1	1	1	1	1	0	1	0	1
2.A.53	5	5	8	7	10	6	5	7	8	6	4	5	4	4	8	6	9	3	10	6	6	10	5	9	7	4	6	8	9	9	13	9	8	5	6	6	7	5	10	5	7	9	7	8	5	3	7	8	8
2.A.54	0	0	0	0	0	0	0	0	0	0	0	0	0	0	0	0	0	1	0	0	0	0	0	0	0	0	0	0	0	0	0	0	0	0	0	0	0	0	0	0	0	0	0	0	0	0	0	0	0
2.A.55	2	1	2	2	4	3	2	2	1	1	1	1	1	3	1	4	2	1	16	1	1	2	2	3	2	1	2	2	1	1	1	1	1	1	1	1	2	3	1	1	1	2	2	2	1	1	2	2	1
2.A.56	0	0	0	0	0	0	0	0	0	0	0	1	0	0	0	0	0	0	0	0	0	2	0	0	0	0	0	0	0	0	0	0	0	0	0	0	0	0	0	0	0	0	0	0	0	0	0	0	0
2.A.57	1	3	1	1	1	1	1	3	8	2	4	1	1	2	1	1	1	1	2	1	1	1	2	1	1	2	2	1	1	1	1	1	1	1	1	1	1	1	1	1	1	1	2	1	1	1	1	1	1
2.A.59	2	4	1	1	1	1	1	1	1	0	3	0	1	0	1	1	1	1	1	1	0	1	1	3	1	1	1	4	0	2	2	0	0	0	0	0	0	0	0	0	0	0	1	1	0	1	1	1	1
2.A.66	10	5	4	5	5	7	5	8	6	3	7	6	5	6	4	5	5	5	10	5	4	8	8	6	5	4	7	7	8	6	6	7	9	7	6	6	8	5	6	4	5	5	7	6	4	4	8	9	8
2.A.67	8	8	8	14	16	20	21	21	14	10	10	9	17	15	10	14	14	12	17	9	12	30	12	11	11	8	17	14	10	8	9	14	12	9	17	13	12	67	18	24	13	19	17	17	9	14	18	22	12
2.A.72	3	4	1	0	1	0	1	0	0	2	1	3	2	0	0	1	1	1	1	1	1	2	0	1	0	2	0	3	2	1	1	2	3	1	2	2	2	2	4	1	3	1	0	0	1	1	0	0	0
2.A.77	0	0	0	0	0	0	0	0	0	0	0	0	0	0	0	1	0	0	0	0	0	0	0	0	0	0	0	0	0	0	0	0	0	0	0	0	0	0	0	0	0	0	0	0	0	0	0	0	0
2.A.82	0	0	0	0	0	0	0	0	0	0	0	0	0	0	0	0	0	0	0	0	0	0	0	0	0	0	0	0	0	0	0	0	0	0	0	0	0	0	0	0	0	0	0	0	0	0	0	1	0
2.A.85	0	0	0	0	0	0	0	0	0	2	0	0	0	0	0	0	0	0	1	0	0	1	1	0	0	0	0	0	0	0	0	0	0	0	0	0	0	0	0	0	0	0	0	0	0	0	0	1	0
2.A.89	2	3	1	1	1	1	1	1	2	1	1	1	1	1	1	1	1	2	1	1	1	2	1	2	1	1	1	1	2	1	1	3	1	1	1	1	1	1	1	2	3	1	1	2	1	1	1	1	1
2.A.92	0	0	0	0	0	0	1	0	0	0	0	0	0	0	0	0	0	0	0	0	0	0	0	0	0	0	0	0	0	0	0	0	0	0	0	0	0	0	0	0	0	1	2	0	0	0	0	0	0
2.A.93	0	0	0	0	0	0	0	0	0	0	0	0	0	0	0	0	0	0	0	0	0	0	0	0	0	0	0	0	0	0	0	0	0	0	0	0	0	0	0	0	0	0	0	0	0	0	0	0	0
2.A.94	1	1	1	3	2	1	2	5	2	6	2	0	2	2	2	1	1	1	1	2	2	3	2	2	1	2	1	2	2	3	1	2	2	2	3	1	2	1	1	2	1	6	3	1	1	2	2	2	2
2.A.96	2	1	6	1	5	2	3	2	3	4	13	2	4	2	3	4	3	5	4	2	2	8	2	2	1	1	2	2	2	1	2	4	2	0	5	2	2	2	4	2	2	4	2	2	2	3	6	7	5
2.A.97	2	2	2	2	2	2	1	5	1	2	2	2	2	2	1	2	1	1	2	2	2	2	2	2	2	1	1	1	2	2	1	2	2	2	1	2	2	3	1	1	2	1	1	1	1	1	2	3	2
2.A.100	1	1	1	0	2	1	0	0	0	0	1	3	0	0	0	0	0	1	1	1	0	1	0	0	1	1	1	0	0	1	1	0	0	0	0	0	0	0	0	0	0	0	0	0	0	1	0	0	0
3.A.1	40	46	32	45	71	71	43	42	43	42	87	71	44	51	48	63	63	45	126	49	45	94	42	44	35	58	66	53	47	53	64	64	51	52	64	55	72	39	68	38	43	35	52	77	27	41	50	62	41
3.A.2	21	20	20	22	20	25	20	22	20	21	21	20	20	17	20	23	20	21	22	17	22	28	22	22	24	22	20	21	23	23	27	27	25	31	26	21	34	32	36	21	21	25	21	25	19	14	21	25	21
3.A.3	18	31	15	26	20	24	18	17	16	20	22	15	18	19	17	26	20	16	25	21	17	28	16	21	26	18	22	22	25	23	29	45	35	31	32	26	36	37	38	29	25	24	18	31	19	14	17	34	17
3.A.4	0	0	0	0	0	0	0	0	0	0	0	0	0	0	0	0	0	0	0	0	1	0	0	0	0	0	0	0	0	0	0	0	0	0	0	0	0	0	0	0	0	0	0	0	0	0	0	0	0
3.A.5	13	13	11	14	12	10	13	13	12	10	12	13	13	13	12	12	11	14	12	11	12	12	13	13	11	12	13	12	13	12	13	12	13	13	14	13	17	12	12	14	12	13	12	13	11	10	12	12	11
3.A.6	0	0	0	0	0	0	0	0	0	0	0	0	0	0	0	0	0	0	0	0	0	0	0	0	0	0	0	0	0	0	0	0	0	0	0	0	0	0	0	0	0	0	0	0	0	0	0	0	0
3.A.7	2	3	2	1	1	1	2	1	2	1	2	1	1	2	1	2	2	1	1	2	2	1	1	2	2	1	1	0	2	1	1	2	4	2	1	1	3	1	2	1	2	2	2	0	2	1	1	1	1
3.A.8	20	21	18	20	24	18	18	23	17	21	20	19	19	16	14	19	18	19	21	17	18	25	18	16	19	18	15	22	17	17	21	22	18	17	24	19	27	18	18	17	16	20	18	18	17	13	21	22	21
3.A.9	1	3	2	2	1	1	3	1	1	0	0	2	0	0	1	1	1	0	2	0	0	5	2	0	1	2	9	1	1	1	0	1	0	0	0	0	2	2	2	1	0	1	2	1	0	1	1	5	1
3.A.16	17	14	13	18	17	21	13	14	16	15	16	18	17	15	15	13	15	17	17	13	14	24	15	12	15	22	15	14	14	13	14	14	21	13	21	16	19	15	16	16	15	17	15	16	14	15	14	15	15
3.A.17	1	0	1	1	1	1	1	1	1	1	0	1	1	1	1	1	1	1	1	1	1	1	1	1	1	1	1	1	1	1	1	1	1	1	1	1	1	1	1	1	1	1	1	1	1	0	1	1	1
3.A.18	32	30	26	24	25	27	26	27	26	30	39	24	27	29	21	32	28	27	35	26	27	32	26	24	30	28	27	28	27	26	29	30	32	29	28	26	38	27	29	26	26	24	27	30	25	24	30	26	24
3.A.19	1	1	1	1	1	1	1	1	1	1	1	1	1	1	1	1	1	1	2	1	1	1	1	1	1	1	1	1	1	1	1	1	1	1	1	1	1	1	1	1	1	1	1	1	1	1	1	1	1
3.A.20	35	22	23	29	23	71	25	27	28	31	45	52	22	37	24	28	26	30	53	28	21	41	39	33	31	29	25	26	18	38	33	18	20	25	22	15	18	22	19	21	20	22	29	25	15	16	75	150	38
3.B.1	2	2	3	2	2	3	2	2	2	2	2	2	2	3	3	2	3	2	4	2	2	1	2	3	2	2	2	3	3	2	2	2	2	2	3	3	1	2	3	2	2	1	2	2	2	1	2	2	2
3.D.1	29	27	28	27	29	37	27	32	29	32	28	28	29	28	28	33	27	28	28	34	29	31	28	34	27	27	27	27	27	30	40	30	31	26	32	26	29	31	41	29	26	26	31	28	29	24	27	28	31
3.D.2	1	1	1	1	1	1	1	1	1	1	1	1	1	1	1	1	1	1	2	0	1	1	1	1	1	2	1	1	1	1	1	1	1	1	1	2	1	2	1	1	1	1	1	1	1	0	1	1	1
3.D.3	1	1	1	1	1	2	1	1	2	2	1	1	1	1	1	2	1	1	1	1	1	2	1	2	1	1	1	1	1	1	2	1	1	1	1	1	1	1	1	1	1	1	2	1	1	1	1	1	1
3.D.4	11	15	12	16	12	14	13	15	15	13	12	9	12	11	12	12	14	10	11	10	14	13	10	12	11	9	12	14	17	11	17	17	20	13	16	12	17	11	18	14	14	13	13	11	13	11	11	10	13
3.D.5	1	2	1	1	1	2	1	2	2	1	2	1	2	1	1	1	0	2	1	1	1	2	2	1	1	1	1	3	1	1	2	1	1	1	1	0	1	2	1	2	1	2	1	1	1	1	1	1	1
3.E.1	0	0	0	1	0	0	1	1	0	0	0	0	6	1	0	0	0	7	0	1	2	0	1	0	1	0	1	0	1	0	0	1	1	1	1	0	1	1	2	1	2	1	1	1	1	0	1	0	1
3.E.2	0	0	0	0	0	0	0	0	0	0	0	0	0	0	0	0	0	0	0	0	0	0	0	0	0	0	0	0	0	0	0	0	0	0	0	0	0	0	0	0	0	0	0	0	0	0	0	0	1
4.C.1	15	13	15	19	35	11	12	7	18	25	10	25	12	15	17	14	15	16	24	10	10	20	8	12	12	35	14	13	9	12	14	9	10	7	10	8	9	12	10	8	9	7	12	16	11	8	9	13	7
4.C.2	4	5	4	4	5	5	4	18	6	6	4	4	4	4	4	4	4	4	8	4	6	4	4	4	6	6	4	7	5	4	4	5	6	4	7	6	5	7	6	5	5	3	4	4	4	4	4	4	4
4.C.3	1	0	0	0	0	1	1	1	0	0	0	0	0	0	0	0	0	0	2	0	0	0	0	0	0	0	1	1	0	1	1	0	0	0	0	0	0	0	0	0	0	0	1	1	0	0	1	1	1
5.A.1	0	0	0	0	0	0	0	0	0	0	0	0	0	0	0	0	0	0	0	0	0	0	0	0	0	1	0	0	0	0	0	0	0	0	0	0	0	0	0	0	0	0	0	0	0	0	0	0	0
5.A.4	3	4	3	4	4	4	3	3	3	2	3	3	3	3	3	3	2	3	4	5	3	5	3	3	3	3	3	4	3	4	7	3	3	3	2	4	3	3	3	3	3	3	3	4	3	5	4	5	3
5.B.1	7	8	6	12	12	13	7	9	10	7	11	13	11	10	9	12	8	7	11	13	8	11	9	10	11	7	13	7	8	9	10	11	7	6	8	9	9	7	7	5	8	6	12	9	7	11	10	15	10
5.B.2	0	0	0	0	0	0	0	0	0	0	0	1	0	0	0	0	0	0	0	0	0	0	0	0	0	0	0	0	0	0	0	0	0	0	0	0	0	0	0	0	0	0	0	0	0	0	0	0	0
8.A.5	14	14	10	26	40	36	34	16	26	7	32	25	32	44	13	18	32	40	71	24	21	47	12	11	24	12	25	21	16	13	11	21	22	15	16	20	19	16	17	11	18	9	25	14	11	21	17	15	11
8.A.6	0	0	0	0	0	0	0	0	0	0	0	0	0	0	0	0	0	0	0	0	0	0	0	0	0	0	0	0	0	0	0	0	0	0	1	0	0	0	0	0	0	0	0	0	1	0	0	0	0
8.A.9	1	2	1	0	2	0	0	1	0	2	1	1	0	1	2	1	1	3	5	2	0	0	1	3	1	1	1	0	0	1	3	0	0	0	0	0	0	0	0	0	0	0	1	1	0	1	1	1	1
8.A.11	0	1	1	0	1	0	1	0	1	1	0	1	2	0	0	1	1	1	0	0	0	0	0	1	0	1	1	1	0	0	0	0	0	0	0	0	0	1	0	0	0	0	1	0	1	0	0	0	0
8.A.13	1	1	1	1	1	1	1	3	1	1	1	1	1	1	1	1	1	2	1	1	1	1	1	1	1	1	1	1	1	1	1	1	1	1	2	1	2	1	1	1	1	1	1	1	1	1	1	3	1
8.A.15	0	1	0	0	0	0	1	1	0	0	0	1	0	1	0	1	0	0	1	0	0	1	1	1	0	0	0	0	0	1	1	0	0	0	0	0	0	0	0	0	0	0	1	1	1	0	1	1	1
8.A.21	1	1	1	1	1	1	1	1	0	1	0	4	1	1	0	1	1	1	0	1	1	1	2	1	1	1	1	1	1	1	1	1	1	3	1	1	4	1	1	1	1	1	1	1	1	1	1	3	1
8.A.27	1	1	1	1	1	2	1	1	1	1	1	1	1	1	1	1	1	1	1	1	1	1	1	1	1	1	1	2	1	1	1	1	1	1	1	1	1	1	1	1	1	1	1	1	1	1	1	1	1
8.A.28	16	55	1	2	4	2	2	10	65	1	1	3	3	2	6	11	5	1	20	134	30	17	7	1	11	2	3	7	60	0	18	54	39	21	19	22	46	13	12	5	30	16	2	11	8	4	8	42	10
8.A.30	2	7	2	2	2	1	2	4	1	7	1	1	3	2	3	4	3	4	2	1	2	2	2	3	2	27	2	3	5	2	2	8	3	4	3	35	5	4	3	2	2	11	2	2	2	2	2	2	2
8.A.32	19	10	6	15	7	15	21	30	13	9	12	20	19	32	4	8	7	10	45	9	5	5	118	5	9	13	32	9	22	10	12	26	23	19	20	27	23	28	18	12	20	15	30	14	15	7	12	14	13
8.A.34	2	4	1	3	2	2	2	2	1	2	3	2	5	2	2	2	2	2	2	1	3	2	2	3	1	2	2	3	2	2	2	3	2	2	2	2	3	3	2	3	2	2	2	2	3	2	2	2	1
8.B.9	1	0	6	2	4	2	0	0	6	1	4	1	0	3	1	1	5	1	1	0	0	2	1	4	1	0	3	2	0	2	4	1	1	0	0	1	1	2	0	2	0	0	3	1	1	2	1	1	0
9.A.1	0	0	1	0	0	1	1	1	0	1	1	1	0	1	0	0	0	0	0	1	1	0	0	0	1	1	0	1	1	0	0	0	2	4	1	4	0	1	1	0	3	0	0	0	0	0	0	0	0
9.A.2	1	1	1	1	1	1	1	1	1	1	1	1	1	1	0	1	1	1	1	1	1	1	1	1	1	1	1	1	1	1	1	1	1	1	1	1	2	2	1	2	1	1	1	1	1	1	1	1	1
9.A.6	1	2	1	1	4	0	1	1	0	0	1	0	1	1	1	1	1	1	2	1	1	0	1	1	1	0	1	2	1	1	1	1	1	1	1	1	1	2	1	1	1	5	1	2	1	0	1	1	1
9.A.10	21	13	19	18	27	10	14	12	5	11	20	3	19	9	17	11	18	8	37	16	11	30	13	4	23	18	13	16	14	10	19	22	15	12	16	17	15	21	18	17	18	28	16	19	15	9	17	17	17
9.A.14	24	22	19	18	22	24	22	23	26	22	21	22	21	19	23	19	22	16	35	21	20	27	22	22	19	20	22	19	19	23	24	25	19	19	23	22	24	21	25	23	19	18	26	19	25	14	27	28	22
9.A.17	2	2	1	4	2	2	2	2	3	1	1	3	2	2	1	2	2	1	1	3	3	2	2	1	2	2	1	1	3	2	2	3	4	3	3	3	3	3	4	3	3	3	2	2	3	2	2	2	2
9.A.19	1	1	1	1	1	1	1	1	1	1	1	1	1	1	1	1	1	2	1	1	1	1	1	1	1	1	1	1	1	2	3	1	1	1	1	1	1	2	1	1	1	5	1	1	1	1	1	2	2
9.A.25	0	0	0	0	0	0	0	0	0	0	0	0	0	0	0	0	0	0	0	0	0	0	0	0	0	0	0	0	0	0	0	0	0	0	0	0	0	0	0	0	0	0	0	0	0	0	0	1	0
9.A.26	0	0	1	3	14	15	9	4	8	7	22	20	12	7	3	5	7	7	21	8	10	22	6	5	4	5	7	7	2	3	3	4	2	2	4	3	3	3	3	7	3	10	6	7	2	5	5	7	4
9.A.27	0	0	0	1	0	0	0	0	0	0	0	0	0	0	0	0	0	0	0	0	0	0	0	0	0	0	0	0	0	0	0	0	0	0	0	0	0	0	0	0	0	0	0	0	0	0	0	0	0
9.A.34	2	2	3	4	3	3	3	2	5	1	1	2	3	2	2	2	2	2	2	2	2	2	2	2	2	2	5	2	2	4	3	4	3	3	2	2	3	5	2	3	3	2	3	5	2	2	4	7	3
9.A.36	1	1	1	1	0	1	1	1	1	1	0	2	1	1	1	0	1	0	0	0	1	1	0	1	1	1	1	1	1	1	1	1	1	1	1	1	1	1	1	1	1	1	1	1	1	1	0	0	0
9.A.40	1	1	1	1	2	1	1	1	1	2	1	2	1	2	3	4	1	3	5	1	1	2	1	3	1	2	1	3	4	2	2	2	2	2	1	2	2	1	2	1	1	1	1	1	2	1	1	1	1
9.A.45	1	1	1	1	1	1	1	1	1	2	1	1	1	0	1	1	1	1	1	1	1	1	1	1	1	1	1	1	1	1	1	1	1	1	1	1	1	1	1	1	1	1	1	1	1	1	1	1	1
9.A.48	0	0	0	0	0	0	0	0	0	0	0	0	0	0	0	0	0	0	0	0	0	0	0	0	0	0	0	1	7	1	1	10	6	3	5	3	12	0	4	0	5	0	0	0	0	0	0	0	0
9.A.50	39	29	24	23	24	28	26	28	26	29	33	28	26	23	23	23	23	28	39	23	34	29	24	25	23	24	31	27	31	30	41	36	32	31	36	31	33	33	36	27	31	27	28	28	29	21	24	24	23
9.A.55	1	1	1	1	1	1	1	0	1	1	1	1	1	0	1	1	1	0	1	1	1	0	0	1	1	1	1	1	0	1	0	0	0	0	0	0	0	0	0	1	0	1	1	0	1	1	0	0	0
9.B.1	1	2	2	3	1	2	0	2	1	1	1	1	2	1	0	0	0	1	2	1	0	0	1	1	0	1	0	2	2	1	1	2	2	2	0	1	2	0	2	0	2	1	2	0	1	1	1	1	1
9.B.7	0	0	0	0	0	0	0	0	0	0	0	0	0	0	1	0	0	0	0	1	0	0	0	0	0	0	0	0	0	0	0	0	0	0	0	0	0	0	0	0	0	0	0	0	0	0	0	0	0
9.B.10	2	2	2	2	2	2	2	3	2	1	2	2	1	2	2	2	2	2	2	1	3	2	2	2	2	2	2	2	2	2	2	2	2	2	2	2	2	1	2	2	2	2	2	1	1	1	2	2	1
9.B.12	1	1	0	3	3	1	3	1	2	1	3	2	0	0	1	1	2	2	2	1	2	1	1	3	1	2	1	1	0	3	3	0	2	1	1	1	0	0	0	2	0	1	2	0	1	0	1	1	1
9.B.16	0	0	0	0	0	0	0	0	0	0	0	0	0	0	0	0	0	0	0	0	0	0	0	0	0	0	0	0	0	0	0	0	0	0	0	0	0	0	0	0	0	0	0	0	0	1	0	0	0
9.B.17	0	1	0	0	0	0	0	0	0	1	1	0	0	0	1	0	0	1	0	0	0	0	0	0	0	0	0	0	0	0	0	0	0	0	0	0	0	0	0	0	0	0	0	0	0	0	0	0	0
9.B.21	1	1	1	1	1	1	1	1	1	1	1	1	1	1	1	1	1	1	2	1	1	1	1	1	1	0	1	1	1	1	1	1	2	1	1	1	1	1	1	1	1	1	1	1	1	1	1	1	1
9.B.24	1	2	1	3	1	1	1	2	1	1	1	1	1	2	2	2	2	2	2	1	2	2	2	2	1	1	2	2	1	2	2	1	1	0	1	1	2	2	1	1	2	1	2	1	2	1	2	2	2
9.B.25	3	4	2	4	2	2	3	3	3	3	3	2	3	3	2	2	3	2	3	3	2	2	2	2	3	3	2	2	3	2	2	3	3	3	3	2	2	2	2	3	3	2	2	2	2	2	3	2	2
9.B.26	1	2	1	1	1	1	1	2	1	1	1	1	1	1	1	2	1	1	1	1	1	2	1	1	1	1	2	1	1	1	3	1	1	1	1	1	1	1	1	1	1	1	1	1	1	1	1	1	1
9.B.27	3	1	1	2	1	1	1	1	1	1	1	1	2	1	1	1	1	1	2	2	1	3	1	1	1	2	1	2	1	1	1	1	2	1	1	1	1	1	1	1	1	3	1	1	1	1	1	1	1
9.B.32	1	1	0	0	1	0	0	0	0	0	0	0	0	0	0	2	1	0	0	0	0	0	0	2	0	0	0	0	0	1	1	0	0	0	0	1	0	1	0	0	1	0	0	0	0	0	0	0	1
9.B.34	0	0	0	0	0	0	0	0	0	0	0	0	0	0	0	0	0	0	0	0	0	0	0	0	0	0	0	0	0	1	1	0	0	0	0	0	0	0	0	0	0	0	0	0	0	0	0	0	0
9.B.35	1	1	1	1	1	2	1	1	1	2	1	1	1	1	1	1	1	1	1	1	1	1	1	1	1	1	1	1	0	1	1	1	1	1	1	1	1	1	1	1	1	1	1	0	0	1	1	0	1
9.B.37	3	2	1	2	2	1	5	3	8	0	3	2	0	2	3	2	1	2	0	10	2	4	5	1	2	2	2	0	3	3	1	4	6	1	4	5	3	6	5	4	2	6	3	0	2	0	2	2	3
9.B.38	0	0	0	0	0	0	0	0	0	0	0	0	0	0	0	0	0	0	0	0	0	0	0	0	0	0	0	0	0	0	0	0	0	0	0	0	0	0	0	0	0	0	0	0	0	0	0	0	0
9.B.45	3	5	1	8	1	9	6	1	6	5	3	6	6	4	0	2	4	1	5	2	1	2	2	2	10	3	2	1	3	0	7	5	3	10	6	6	6	1	4	7	2	1	4	4	0	3	0	5	3
9.B.70	0	0	0	0	0	0	0	0	0	0	0	0	0	0	0	0	0	0	0	0	0	0	0	0	0	0	0	0	0	0	0	0	0	0	0	0	0	0	0	0	0	0	0	0	0	0	0	1	0
9.B.74	0	0	0	0	0	0	0	0	0	0	0	0	0	0	0	0	0	0	0	0	0	1	0	0	0	0	0	0	0	0	0	0	0	0	0	0	0	0	0	0	0	0	0	0	0	0	0	0	0
9.B.75	0	0	0	0	0	0	0	0	0	0	1	0	0	0	0	0	0	0	1	0	0	1	0	0	0	0	0	0	0	0	0	0	0	0	0	0	0	0	0	0	0	0	0	0	0	0	0	0	0
9.B.82	1	1	1	1	1	1	1	1	1	1	1	1	1	1	1	1	1	1	2	1	1	1	1	1	1	1	1	1	1	1	1	1	1	1	1	1	1	1	1	1	1	1	1	1	1	1	1	1	1
9.B.87	0	0	0	0	0	0	0	0	0	0	0	0	0	0	0	0	0	0	1	0	0	0	0	0	0	0	0	0	0	0	0	0	0	0	0	0	0	0	0	0	0	0	0	0	0	0	0	0	0
9.B.102	1	1	1	0	1	1	2	1	1	1	1	1	2	2	1	1	1	1	2	0	2	1	1	1	1	0	1	1	2	1	1	2	3	2	2	2	2	2	2	2	2	2	1	1	2	1	1	1	1
9.B.103	0	1	1	1	1	1	1	1	1	1	1	1	1	1	1	1	1	0	1	1	1	1	1	1	1	1	1	1	2	1	1	1	1	1	0	1	1	0	0	1	1	0	1	1	1	1	1	1	1
9.C.6	1	1	1	0	1	1	0	0	1	1	1	1	0	1	1	1	1	1	1	1	0	1	0	0	0	0	1	1	0	1	1	0	0	0	0	0	0	0	0	0	0	0	1	0	0	1	1	1	1
[truncated: 59 more columns]

## Sheet: Table S4
Table S4 – List of 70 transporter gene families present in the 28 taxa partial subfamily dataset. Transporter Classification Database (TCDB) ID and family names are indicated, as is transporter gene family presence at the root of the partial subfamily dataset as calculated by CAFE5, whether they are significantly expanding and/or contracting as calculated by CAFE5 and their classification as a ba…
Transporter Classification DataBase ID	Family Name	Base Cation Transporter Family (Y/N)	Present at the root of the 28 tree (Y/N)	Significantly expanding and/or contracting (Y/N)
2.A.1.1	The Sugar Porter (SP) Family	N	Y	Y
2.A.1.2	The Drug:H+ Antiporter-1 (12 Spanner) (DHA1) Family	Y	Y	Y
2.A.1.3	The Drug:H+ Antiporter-2 (14 Spanner) (DHA2) Family	Y	Y	Y
2.A.1.7	The Fucose: H+ Symporter (FHS) Family	Y	Y	Y
2.A.1.8	The Nitrate/Nitrite Porter (NNP) family	N	Y	N
2.A.1.9	The Phosphate: H+ Symporter (PHS) Family	N	Y	N
2.A.1.12	The Sialate:H+ Symporter (SHS) Family	N	Y	N
2.A.1.13	The Monocarboxylate Transporter (MCT) Family (Halestrap, 2011)	N	Y	Y
2.A.1.14	The Anion:Cation Symporter (ACS) Family	Y	Y	Y
2.A.1.15	The Aromatic Acid:H+ Symporter (AAHS) Family	N	N	N
2.A.1.16	The Siderophore-Iron Transporter (SIT) Family	N	N	N
2.A.1.19	The Organic Cation Transporter (OCT) Family	N	Y	N
2.A.1.22	The Vesicular Neurotransmitter Transporter (VNT) Family	N	N	N
2.A.1.24	The Vacuolar Basic Amino Acid Transporter (VBAAT) Family	N	Y	N
2.A.1.25	The Peptide/Acetyl-Coenzyme A/Drug Transporter (PAT) Family	N	Y	N
2.A.1.28	The Feline Leukemia Virus Subgroup C Receptor (FLVCR)/Heme Importer Family	N	Y	N
2.A.1.36	The Acriflavin-sensitivity (YnfM) Family	N	Y	N
2.A.1.40	The Major Facilitator Superfamily Domain-containing Protein (MFS-DP) Family	N	Y	N
2.A.1.44	The L-Amino Acid Transporter-3 (LAT3) Family	N	N	N
2.A.1.48	The Vacuolar Basic Amino Acid Transporter (V-BAAT) Family	N	Y	N
2.A.1.53	The Proteobacterial Intraphagosomal Amino Acid Transporter (Pht) Family	N	Y	N
2.A.1.58	The N-Acetylglucosamine Transporter (NAG-T) Family	N	Y	N
2.A.3.1	The Amino Acid Transporter (AAT) Family	N	Y	N
2.A.3.3	The Cationic Amino Acid Transporter (CAT) Family	N	N	N
2.A.3.4	The Amino Acid/Choline Transporter (ACT) Family	N	Y	Y
2.A.3.8	The L-type Amino Acid Transporter (LAT) Family	N	Y	N
2.A.3.10	The Yeast Amino Acid Transporter (YAT) Family	N	Y	Y
3.A.1.1	The Carbohydrate Uptake Transporter-1 (CUT1) Family	N	N	N
3.A.1.2	The Carbohydrate Uptake Transporter-2 (CUT2) Family	N	N	N
3.A.1.3	The Polar Amino Acid Uptake Transporter (PAAT) Family	N	N	N
3.A.1.5	The Peptide/Opine/Nickel Uptake Transporter (PepT) Family	N	Y	N
3.A.1.6	The Sulfate/Tungstate Uptake Transporter (SulT) Family	N	N	N
3.A.1.10	The Ferric Iron Uptake Transporter (FeT) Family	N	N	N
3.A.1.12	The Quaternary Amine Uptake Transporter (QAT) Family	N	N	N
3.A.1.14	The Iron Chelate Uptake Transporter (FeCT) Family	N	Y	N
3.A.1.15	The Manganese/Zinc/Iron Chelate Uptake Transporter (MZT) Family	N	N	N
3.A.1.21	The Siderophore-Fe3+ Uptake Transporter (SIUT) Family	N	N	N
3.A.1.26	The Putative Thiamine Uptake Transporter (ThiW) Family	N	Y	N
3.A.1.30	The Thiamin Precursor (Thi-P) Family	N	N	N
3.A.1.31	The Unknown-ABC1 (U-ABC1) Family	N	Y	N
3.A.1.106	The Lipid Exporter (LipidE) Family	N	Y	N
3.A.1.109	The Protein-1 Exporter (Prot1E) Family	N	Y	N
3.A.1.111	The Peptide-1 Exporter (Pep1E) Family	N	Y	N
3.A.1.120	The (Putative) Drug Resistance ATPase-1 (Drug RA1) Family	N	Y	N
3.A.1.121	The (Putative) Drug Resistance ATPase-2 (Drug RA2) Family	N	Y	N
3.A.1.128	The SkfA Peptide Exporter (SkfA-E) Family	N	N	N
3.A.1.132	The Gliding Motility ABC Transporter (Gld) Family	N	Y	N
3.A.1.139	The UDP-Glucose/Iron Exporter (U-GlcE) Family (UPF0014 Family)	N	Y	N
3.A.1.141	The Ethyl Viologen Exporter (EVE) Family (DUF990 Family)	N	N	N
3.A.1.142	The Glycolipid Flippase (G.L.Flippase) Family	N	N	N
3.A.1.201	The Multidrug Resistance Exporter (MDR) Family	Y	Y	Y
3.A.1.203	The Peroxysomal Fatty Acyl CoA Transporter (P-FAT) Family	N	Y	N
3.A.1.204	The Eye Pigment Precursor Transporter (EPP) Family	N	Y	N
3.A.1.205	The Pleiotropic Drug Resistance (PDR) Family	Y	Y	Y
3.A.1.206	The a-Factor Sex Pheromone Exporter (STE) Family	N	Y	N
3.A.1.208	The Drug Conjugate Transporter (DCT) Family	Y	Y	Y
3.A.1.210	The Heavy Metal Transporter (HMT) Family	Y	Y	Y
3.A.1.211	The Cholesterol/Phospholipid/Retinal (CPR) Flippase Family	N	Y	N
3.A.1.212	The Mitochondrial Peptide Exporter (MPE) Family	N	Y	N
3.A.3.1	NO NAME (Na+-, K+-ATPase Transporters)	N	Y	N
3.A.3.2	NO NAME (Ca2+-, Mn2+-ATPase Transporters)	Y	Y	Y
3.A.3.3	NO NAME (Cation-ATPase Transporters)	N	Y	N
3.A.3.4	NO NAME (Mg2+-ATPase Transporters)	N	Y	N
3.A.3.5	NO NAME (Heavy Metal Cation-ATPase Transporters)	N	Y	N
3.A.3.8	NO NAME (Phospholipid Transporters)	N	Y	Y
3.A.3.10	NO NAME (Cation P-type ATPase Transporters)	Y	Y	Y
3.A.3.14	NO NAME (No information)	N	Y	N
3.A.3.24	NO NAME (Functionally uncharacterised P-type ATPase Transporters)	N	N	N
3.A.3.27	NO NAME (Functionally uncharacterised and Cu2+ P-type ATPase Transporters)	N	N	N
3.A.3.30	NO NAME (Functionally uncharacterised P-type ATPase Transporters)	N	Y	N

## Sheet: Table S5
Table S5 – Information about the isolates included in the pure culture experiment including: the species; the shortened code by which they are refered to; the UP code (where applicable); the CBS code (where applicable); the location, coordinates in SWEREF 99 TM and WGS84, region and country they were collected from (if applicable); the collector (if applicable); the date collected (if known); and…
Code	Species	UP code	Location	Region	Country	Collector	Date collection (YY/MM/DD)	Habitat	Coordinates SWEREF 99 TM		WGS84
Sb1	Suillus bovinus	N/A	Backen, Billingen	Västergötland	Sweden	Petra Fransson	220910	Nature reserve, mixed forest	6468235	424953	58.3486	13.7178
Sb2	Suillus bovinus	N/A	Skövde airport	Västergötland	Sweden	Erica Packard	220911	Sanddune pine forest, no ground vegetation, litter on top	6480778	439277	58.4634	13.9592
Sb3	Suillus bovinus	N/A	Skyttorp Flymyra	Uppland	Sweden	Petra Fransson	220913	56-yr-old pine stand, few spruce, mosses and blueberry	6669207	657428	60.1295	17.8341
Sb4	Suillus bovinus	N/A	Björnlunda	Södermanland	Sweden	Katharine King	221008	Pine and Spruce mixed, near pond, blueberry shrubs amd mosses	6550620	622163	59.0774	17.1314
Sg1	Suillus granulatus	N/A	Knivsta	Uppland	Sweden	Carles Castaneo	220906	Grassland with pine trees, chronosequence grassland study	6592285	644923	59.4441	17.5559
Sg2	Suillus granulatus	N/A	Skyttorp Flymyra	Uppland	Sweden	Petra Fransson	220913	90-yr-old pine stand, some spruce, in grass along dirt track	6668272	662447	60.1191	17.9235
Sg3	Suillus granulatus	N/A	Storvetra	Uppland	Sweden	Erica Packard	220920	Mostly spruce, some pine, grass and moss	6649460	651882	59.9545	17.7198
Sg4	Suillus grevillei	N/A	Hygget, Billingen	Västergötland	Sweden	Petra Fransson	220911	Plantation ca 10 yrs, spruce and larch, some large birch and pine seed trees left, grassy and open	6477502	427937	58.4323	13.7659
Sl1	Suillus luteus	N/A	Backen, Billingen	Västergötland	Sweden	Petra Fransson	220910	Nature reserve, along dirt track leading up, on grass	6467725	424955	58.344	13.718
Sl2	Suillus luteus	N/A	Skyttorp Flymyra	Uppland	Sweden	Petra Fransson	220913	56-yr-old pine stand, few spruce, mosses and blueberry	6669207	657428	60.1295	17.8341
Sl3	Suillus luteus	N/A	Björnlunda	Södermanland	Sweden	Katharine King	221008	Pine and Spruce mixed, near pond, blueberry shrubs amd mosses	6550620	622163	59.0774	17.1314
Sv1	Suillus variegatus	N/A	Oldgrowth reserve	Västergötland	Sweden	Petra Fransson	220911	Oldgrowth reserve with spruce mixed with pine, birch and aspen, blueberry and mosses	6477505	427643	58.4323	13.7609
Sv2	Suillus variegatus	N/A	Fiby urskog	Uppland	Sweden	Petra Fransson	220912	Rock surfaces along path	6641163	631511	59.887	17.3501
Sv3	Suillus variegatus	N/A	Skyttorp Flymyra	Uppland	Sweden	Petra Fransson	220913	56-yr-old pine stand, few spruce, mosses and blueberry	6669207	657428	60.1295	17.8341
Pib	Piloderma byssinum	UP582	N/A	N/A	Sweden	N/A	N/A	N/A	N/A	N/A	N/A	N/A
Pif	Piloderma aff. fallax	UP979	N/A	N/A	Sweden	N/A	N/A	N/A	N/A	N/A	N/A	N/A
Pio	Piloderma olivaceum	N/A	N/A	N/A	Sweden	N/A	N/A	N/A	N/A	N/A	N/A	N/A
Pis	Piloderma sphaerosporum	UP586	N/A	N/A	Sweden	N/A	N/A	N/A	N/A	N/A	N/A	N/A
P. sp. 1	Piloderma	N/A	N/A	N/A	Sweden	N/A	N/A	N/A	N/A	N/A	N/A	N/A
P. sp. 2	Piloderma	N/A	N/A	N/A	Sweden	N/A	N/A	N/A	N/A	N/A	N/A	N/A
Con	Coniophora puteana	N/A	N/A	N/A	N/A	N/A	N/A	N/A	N/A	N/A	N/A	N/A
Ser	Serpula lacrymans	520-91*	N/A	Brussels	Belgium	G.L. Hennebert	N/A	N/A	N/A	N/A	N/A	N/A
*CBS code

## Sheet: Table S6
Table S6 – Pairwise comparisons of C:N ratio in mycelial biomass across gabbro, granite, limited and rich treatments for each fungal species. Values indicate the mean C:N ratio for each species in each treatment with ± standard error (SE). Letters indicate statistically significant differences between treatments within the same species, based on Tukey's HSD test at a significance level of p < 0.0…
Species	granite	limited	gabbro	rich
S. bovinus	13.48 ± 0.69 (a)	12.76 ± 0.69 (a)	14.11 ± 0.69 (a)	13.3 ± 0.69 (a)
S. luteus	13.74 ± 0.8 (ab)	12.59 ± 1.07 (a)	15.66 ± 0.85 (ab)	16.1 ± 0.8 (b)
S. variegatus	19.01 ± 0.8 (a)	17.78 ± 0.8 (a)	19.39 ± 0.8 (a)	17.45 ± 0.8 (a)
S. granulatus	15.66 ± 0.8 (a)	14.18 ± 0.8 (a)	16.81 ± 0.8 (a)	16.59 ± 0.8 (a)
S. grevillei	11.37 ± 1.39 (a)	10.3 ± 1.39 (a)	11.5 ± 1.39 (a)	11.57 ± 1.39 (a)
P. byssinum	6.43 ± 2.4 (a)	6.82 ± 2.4 (a)	6.7 ± 2.4 (a)	6.68 ± 2.4 (a)
P. aff. fallax	8.54 ± 1.39 (a)	8.21 ± 1.39 (a)	8.4 ± 1.39 (a)	9.52 ± 1.39 (a)
P. olivaceum	12.99 ± 1.39 (a)	11.59 ± 1.39 (a)	13.17 ± 1.39 (a)	12.32 ± 1.39 (a)
P. sphaerosporum	10.25 ± 1.39 (a)	10.27 ± 1.39 (a)	10.45 ± 1.39 (a)	10.66 ± 1.39 (a)
P. sp. 1	9.6 ± 1.39 (a)	7.86 ± 1.39 (a)	9.18 ± 1.39 (a)	9.1 ± 1.39 (a)
P. sp. 2	8.33 ± 1.39 (a)	7.57 ± 1.39 (a)	8.86 ± 1.39 (a)	9.37 ± 1.39 (a)
C. puteana	8.54 ± 1.39 (a)	8.57 ± 1.39 (a)	8.79 ± 1.39 (a)	8.86 ± 1.39 (a)
S. lacrymans	7.7 ± 2.4 (a)	7.07 ± 2.4 (a)	7.05 ± 2.4 (a)	6.91 ± 2.4 (a)

## Sheet: Table S7
Table S7 – Pairwise comparisons of C:N ratio in mycelial biomass across species for gabbro, granite, limited and rich treatments. Values indicate the mean C:N ratio for each species in each treatment with ± standard error (SE). Letters indicate statistically significant differences between species within the same treatment, based on Tukey's HSD test at a significance level of p < 0.05.
Species	gabbro	granite	limited	rich
S. bovinus	14.11 ± 0.69 (bcd)	13.48 ± 0.69 (abc)	12.76 ± 0.69 (ab)	13.3 ± 0.69 (ab)
S. luteus	15.66 ± 0.85 (cde)	13.74 ± 0.8 (bc)	12.59 ± 1.07 (ab)	16.1 ± 0.8 (bc)
S. variegatus	19.39 ± 0.8 (e)	19.01 ± 0.8 (d)	17.78 ± 0.8 (c)	17.45 ± 0.8 (c)
S. granulatus	16.81 ± 0.8 (de)	15.66 ± 0.8 (cd)	14.18 ± 0.8 (bc)	16.59 ± 0.8 (bc)
S. grevillei	11.5 ± 1.39 (abcd)	11.37 ± 1.39 (abc)	10.3 ± 1.39 (ab)	11.57 ± 1.39 (ab)
P. byssinum	6.7 ± 2.4 (ab)	6.43 ± 2.4 (ab)	6.82 ± 2.4 (ab)	6.68 ± 2.4 (a)
P. aff. fallax	8.4 ± 1.39 (a)	8.54 ± 1.39 (ab)	8.21 ± 1.39 (a)	9.52 ± 1.39 (a)
P. olivaceum	13.17 ± 1.39 (abcd)	12.99 ± 1.39 (abc)	11.59 ± 1.39 (ab)	12.32 ± 1.39 (abc)
P. sphaerosporum	10.45 ± 1.39 (abc)	10.25 ± 1.39 (ab)	10.27 ± 1.39 (ab)	10.66 ± 1.39 (a)
P. sp. 1	9.18 ± 1.39 (ab)	9.6 ± 1.39 (ab)	7.86 ± 1.39 (a)	9.1 ± 1.39 (a)
P. sp. 2	8.86 ± 1.39 (a)	8.33 ± 1.39 (a)	7.57 ± 1.39 (a)	9.37 ± 1.39 (a)
C. puteana	8.79 ± 1.39 (a)	8.54 ± 1.39 (ab)	8.57 ± 1.39 (a)	8.86 ± 1.39 (a)
S. lacrymans	7.05 ± 2.4 (ab)	7.7 ± 2.4 (abc)	7.07 ± 2.4 (ab)	6.91 ± 2.4 (a)
