# Supplementary material for: Transporter gene family evolution in ectomycorrhizal fungi in relation to mineral weathering capabilities
Source: Copernicus journal article supplement (doi:10.5194/bg-22-8047-2025), 2025-12-17
Supplement: Supplementary file 2 [file Supplementary_Figure_S2.pdf › Supplementary_Figure_S2.pdf]

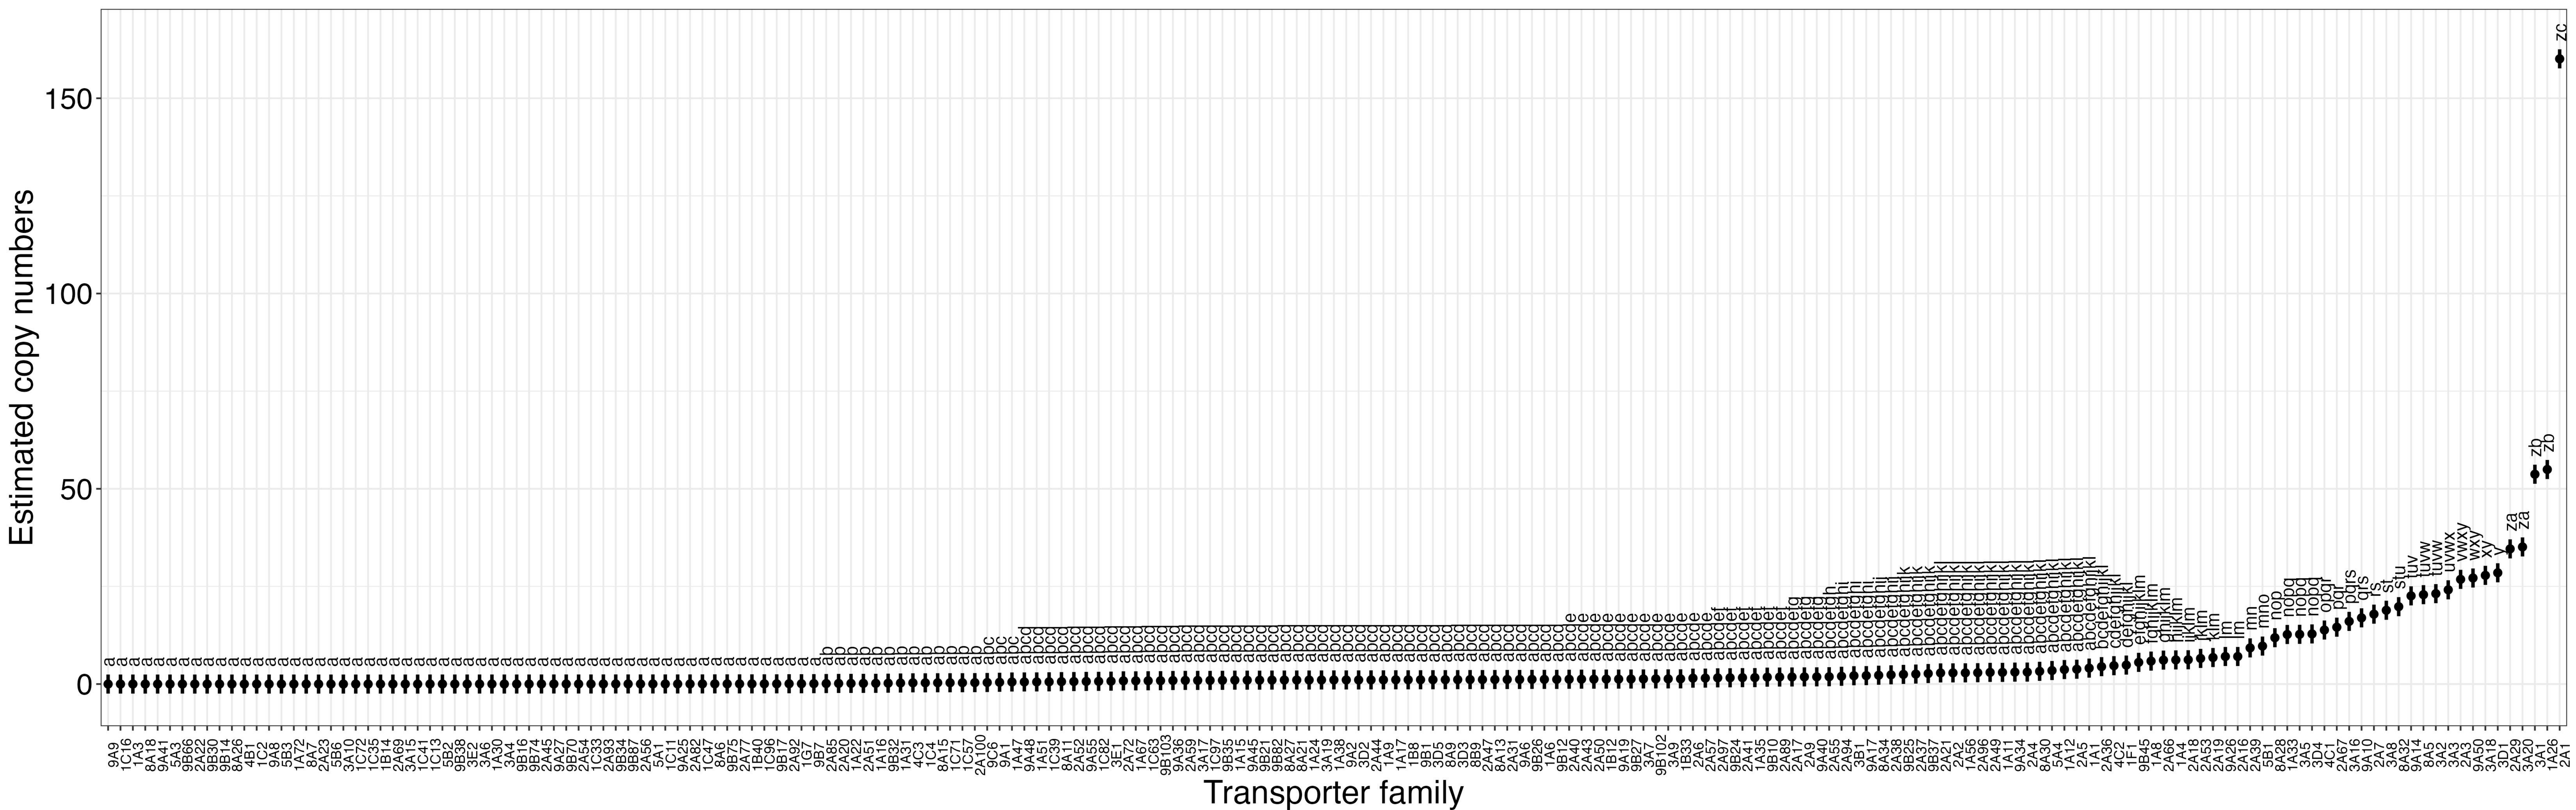

Figure S2 – Variation in copy number in 173 transporter gene families across the Agaricomycotina phylogeny. Effect of species and transporter gene family on transporter gene family copy numbers was tested with two-way analysis of variance (ANOVA) with Tukey's adjustment. testing the effect of species and transporter family on transporter gene family copy numbers. A compact letter display (CLD) indicates transporter gene families which are significantly different from others ( $p > 0.05$ ).
