# Supplementary material for: Transporter gene family evolution in ectomycorrhizal fungi in relation to mineral weathering capabilities
Source: Copernicus journal article supplement (doi:10.5194/bg-22-8047-2025), 2025-12-17
Supplement: Supplementary file 6 [file Supplementary_Figure_S6.pdf › Supplementary_Figure_S6.pdf]

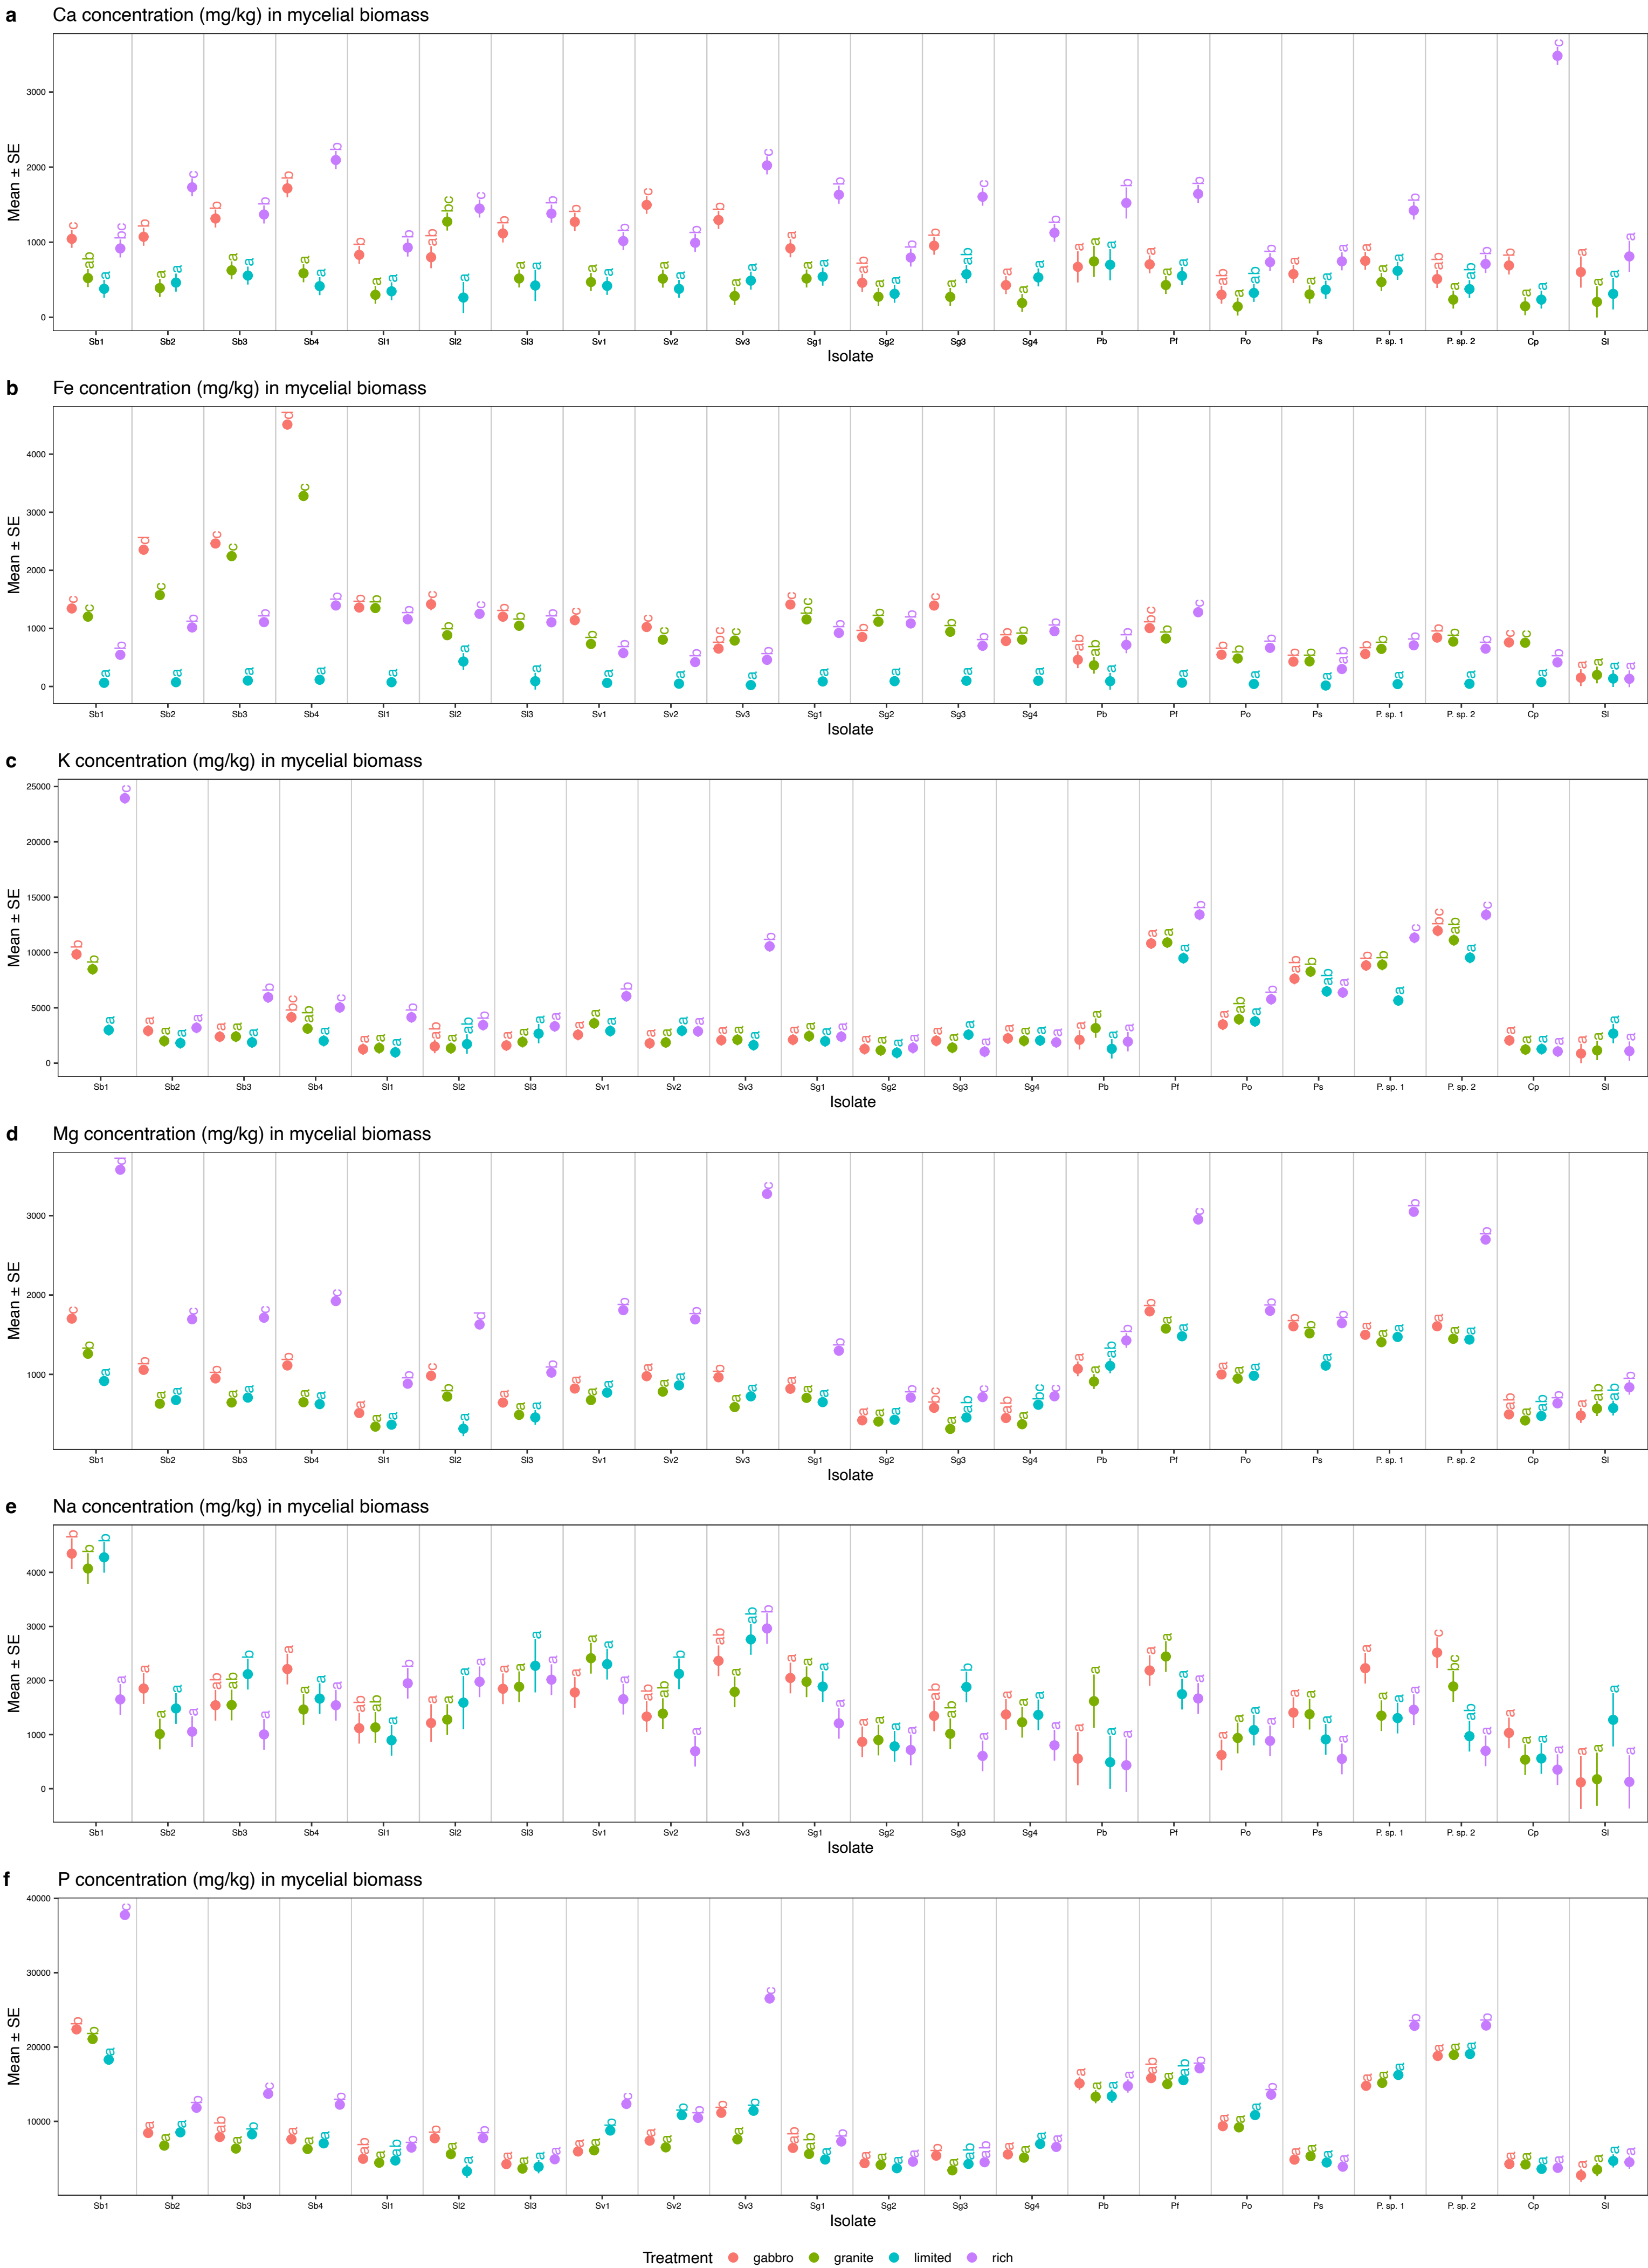

Figure S6 – Elemental concentration (mg/kg) in mycelial biomass across gabbro, granite, limited and rich treatments in 13 fungal species. Panels show: (a) calcium (Ca), (b) iron (Fe), (c) potassium (K), (d) sodium (Na), and (e) phosphorus (P) concentration. Isolates include *Suillus bovinus* (Sb1-4), *S. luteus* (SI1-3), *S. variegatus* (Sv1-3), *S. granulatus* (Sg1-3), *S. grevillei* (Sg4), *Piloderma byssinum* (Pb), *P. aff. fallax* (Pf), *P. olivaceum* (Po), *P. sphaerosporum* (Ps), *Piloderma* sp. 1, *Piloderma* sp. 2, *Coniophora puteana* (Cp), and *Serpula lacrymans* (SI). Data points represent the mean elemental concentration for each treatment within each isolate, with error bars showing standard deviation. Different letters above the data points indicate statistically significant differences between treatments within the same isolate, based on Tukey's HSD test at a significance level of  $p < 0.05$ .
