# Supplementary material for: Transporter gene family evolution in ectomycorrhizal fungi in relation to mineral weathering capabilities
Source: Copernicus journal article supplement (doi:10.5194/bg-22-8047-2025), 2025-12-17
Supplement: Supplementary file 7 [file Supplementary_Figure_S7.pdf › Supplementary_Figure_S7.pdf]

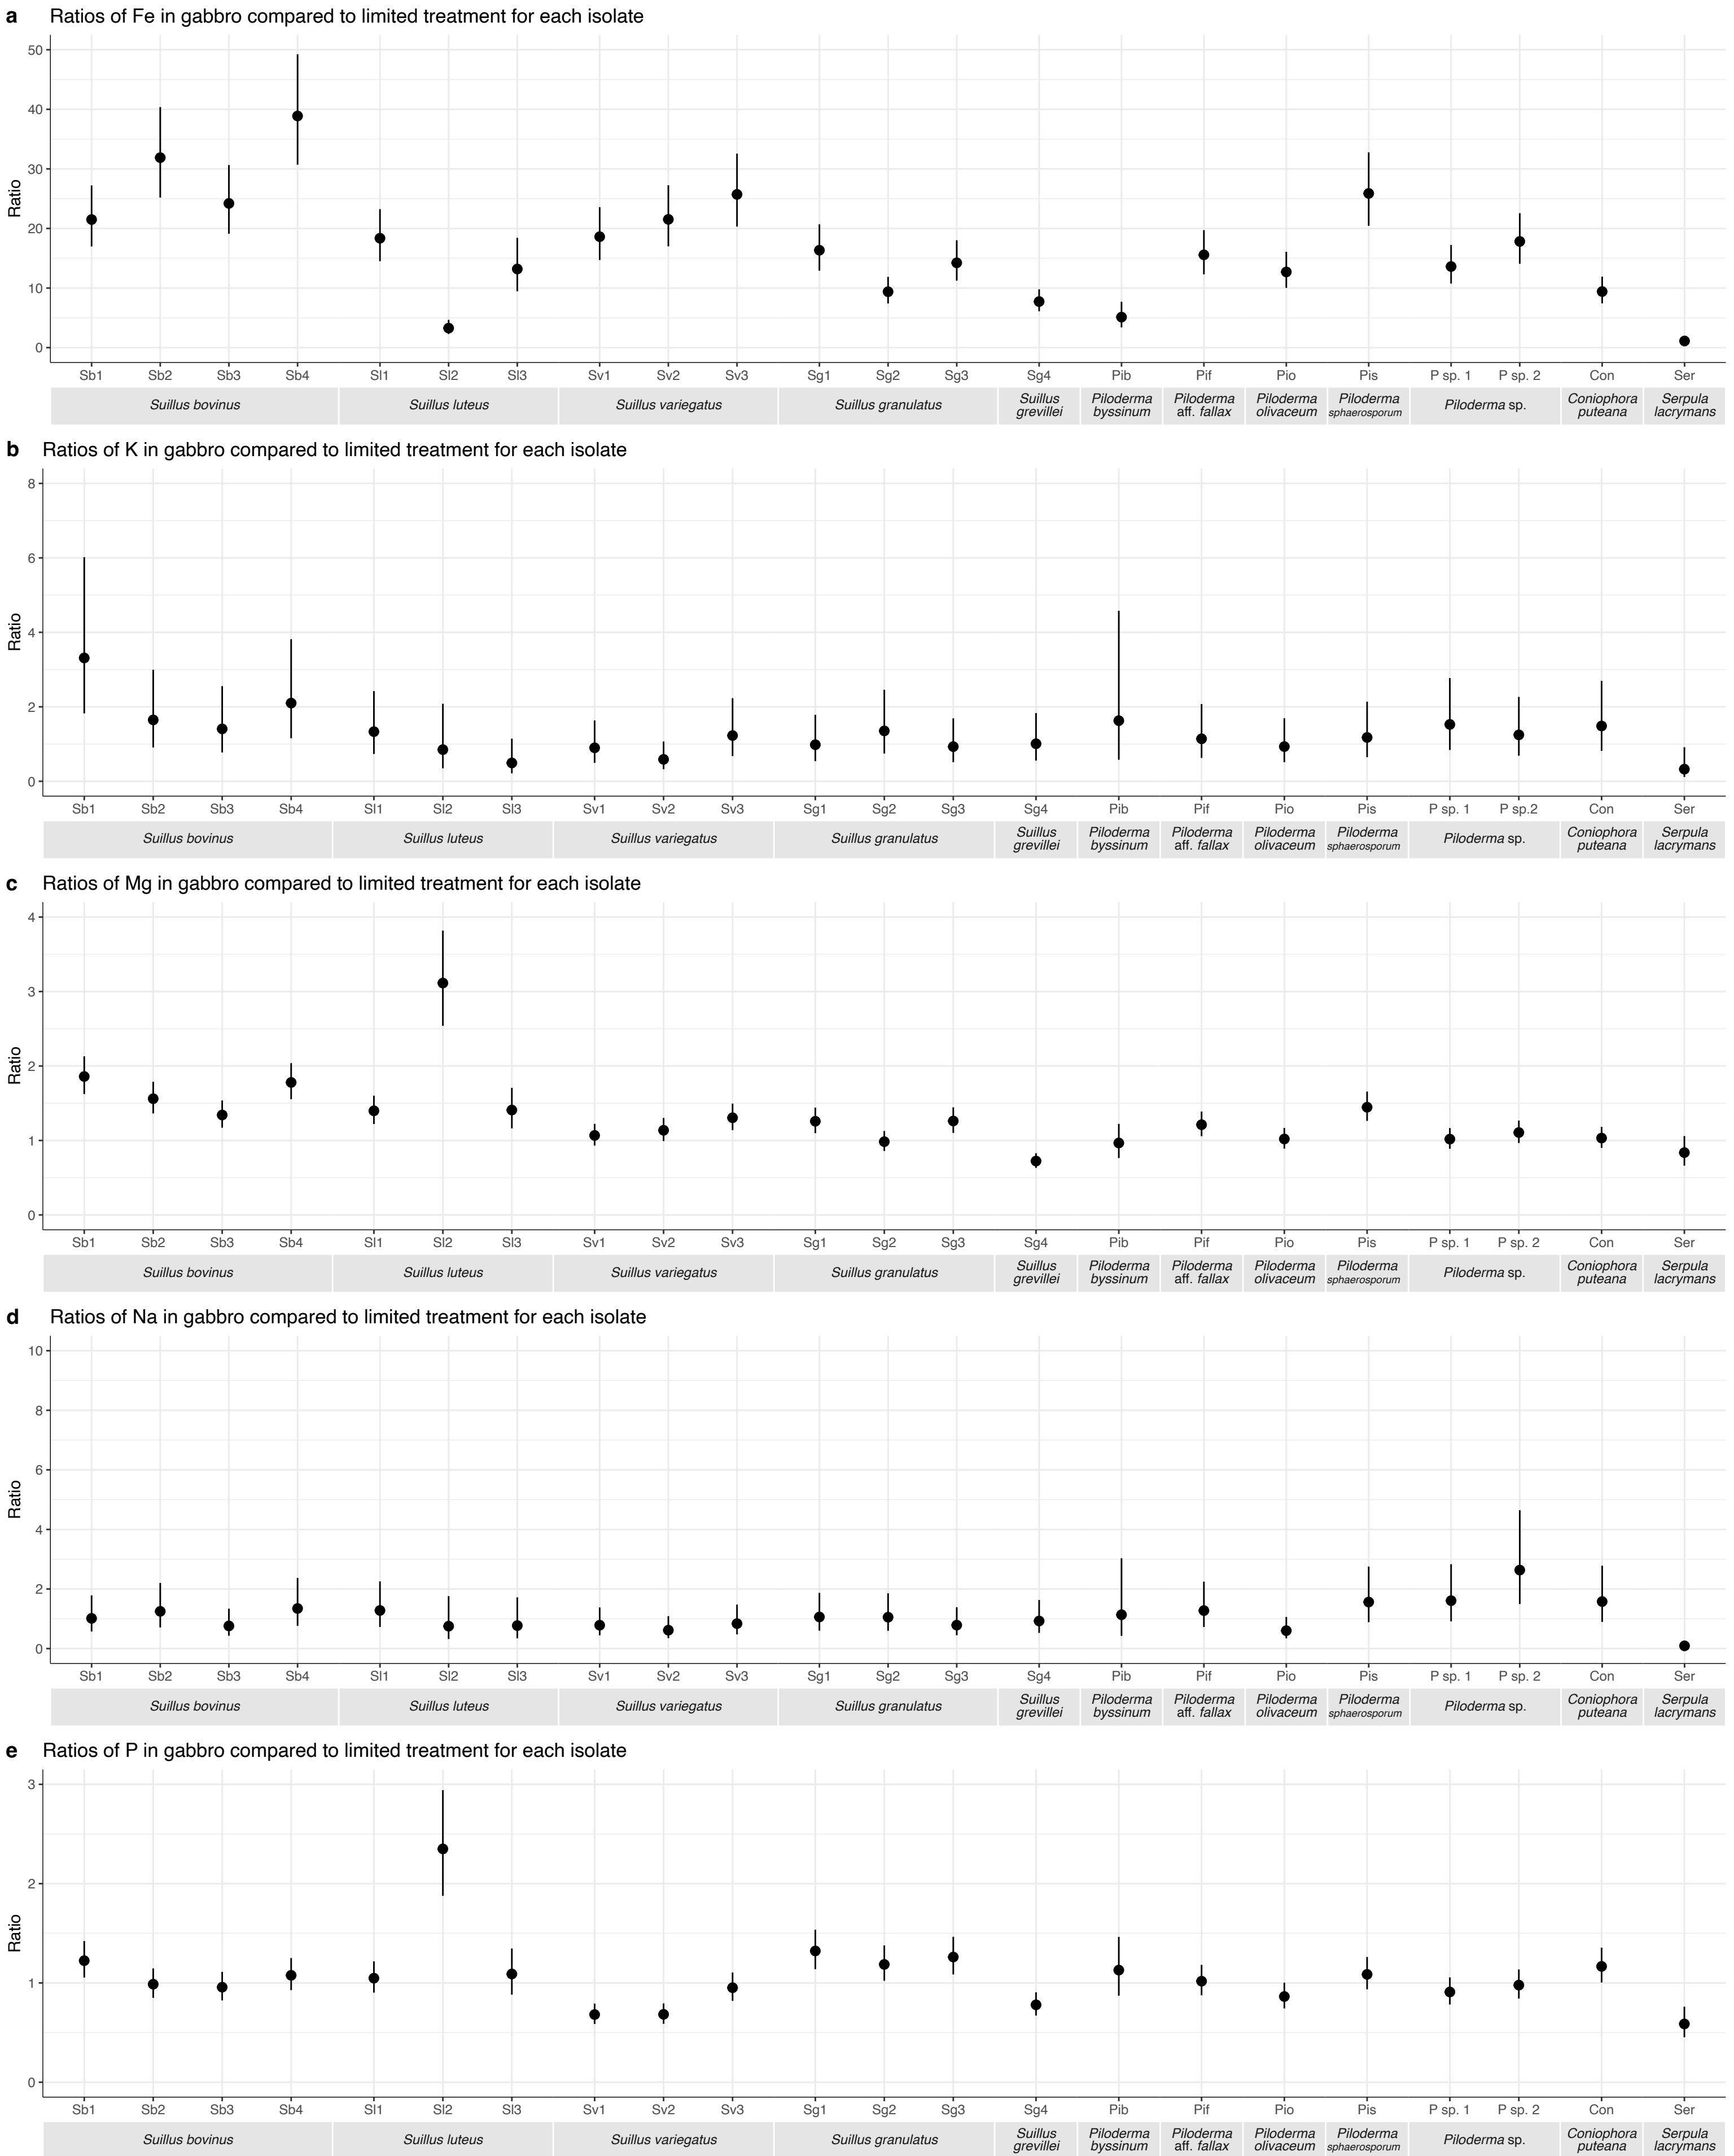

Figure S7 – Ratios of elemental concentration between gabbro and limited treatments for each fungal isolate. Panels show (a) iron (Fe), (b) potassium (K), (c) magnesium (Mg), (d) sodium (Na) and (e) phosphorus (P). Isolates include *Suillus bovinus* (Sb1-4), *S. luteus* (SI1-3), *S. variegatus* (Sv1-3), *S. granulatus* (Sg1-3), *S. grevillei* (Sg4), *Piloderma byssinum* (Pib), *P. aff. fallax* (Pif), *P. olivaceum* (Pio), *P. sphaerosporum* (Pis), *Piloderma* sp. 1, *Piloderma* sp. 2, *Coniophora puteana* (Con), and *Serpula lacrymans* (Ser). Data points represent the mean ratio between gabbro and limited for each isolate, with errorbars indicating the 95 % confidence interval. Isolates with non-overlapping confidence intervals are considered significantly different from one another.
