# Supplementary material for: Transporter gene family evolution in ectomycorrhizal fungi in relation to mineral weathering capabilities
Source: Copernicus journal article supplement (doi:10.5194/bg-22-8047-2025), 2025-12-17
Supplement: Supplementary file 8 [file Supplementary_Figure_S8.pdf › Supplementary_Figure_S8.pdf]

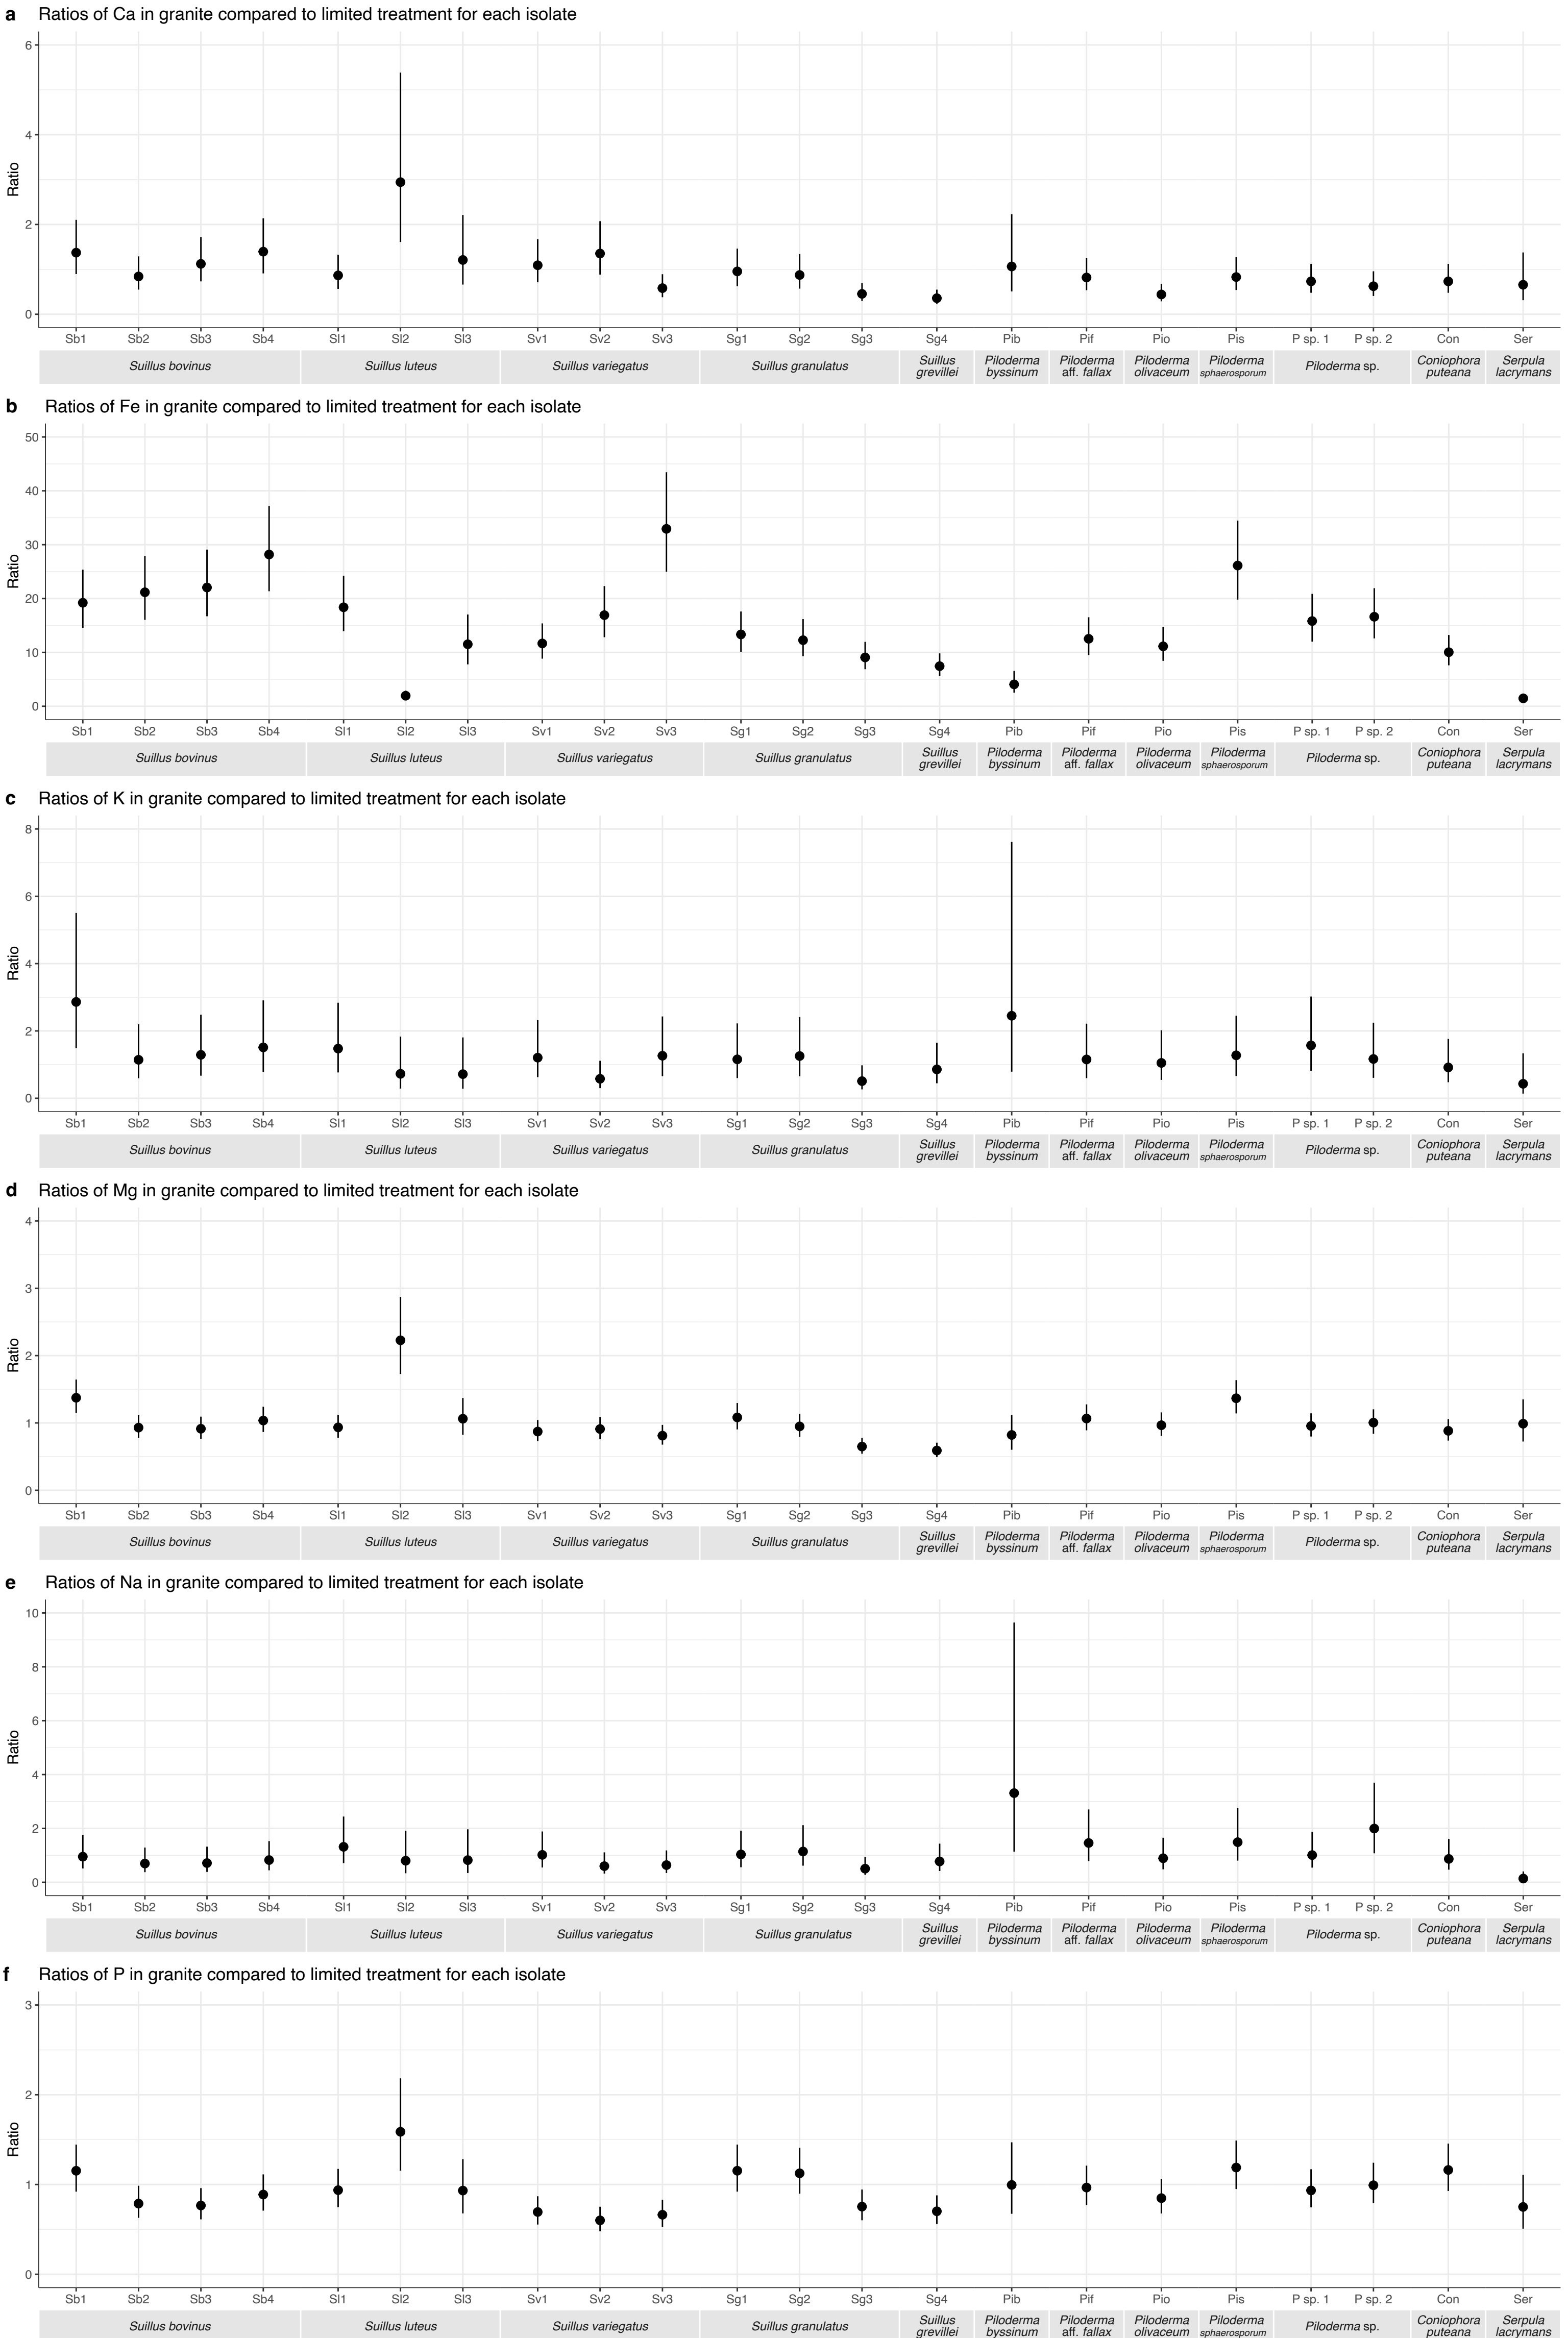

Figure S8 – Ratios of elemental concentration between granite and limited treatments for each fungal isolate. Panels show (a) iron (Fe), (b) potassium (K), (c) magnesium (Mg), (d) sodium (Na) and (e) phosphorus (P). Isolates include *Suillus bovinus* (Sb1-4), *S. luteus* (Sl1-3), *S. variegatus* (Sv1-3), *S. granulatus* (Sg1-3), *S. grevillei* (Sg4), *Piloderma byssinum* (Pib), *P. aff. fallax* (Pif), *P. olivaceum* (Pio), *P. sphaerosporum* (Pis), *Piloderma* sp. 1, *Piloderma* sp. 2, *Coniophora puteana* (Con), and *Serpula lacrymans* (Ser). Data points represent the mean ratio between granite and limited for each isolate, with error bars indicating the 95 % confidence interval. Isolates with non-overlapping confidence intervals are considered significantly different from one another.
