# Supplementary material for: Transporter gene family evolution in ectomycorrhizal fungi in relation to mineral weathering capabilities
Source: Copernicus journal article supplement (doi:10.5194/bg-22-8047-2025), 2025-12-17
Supplement: Supplementary file 9 [file Supplementary_Figure_S9.pdf › Supplementary_Figure_S9.pdf]

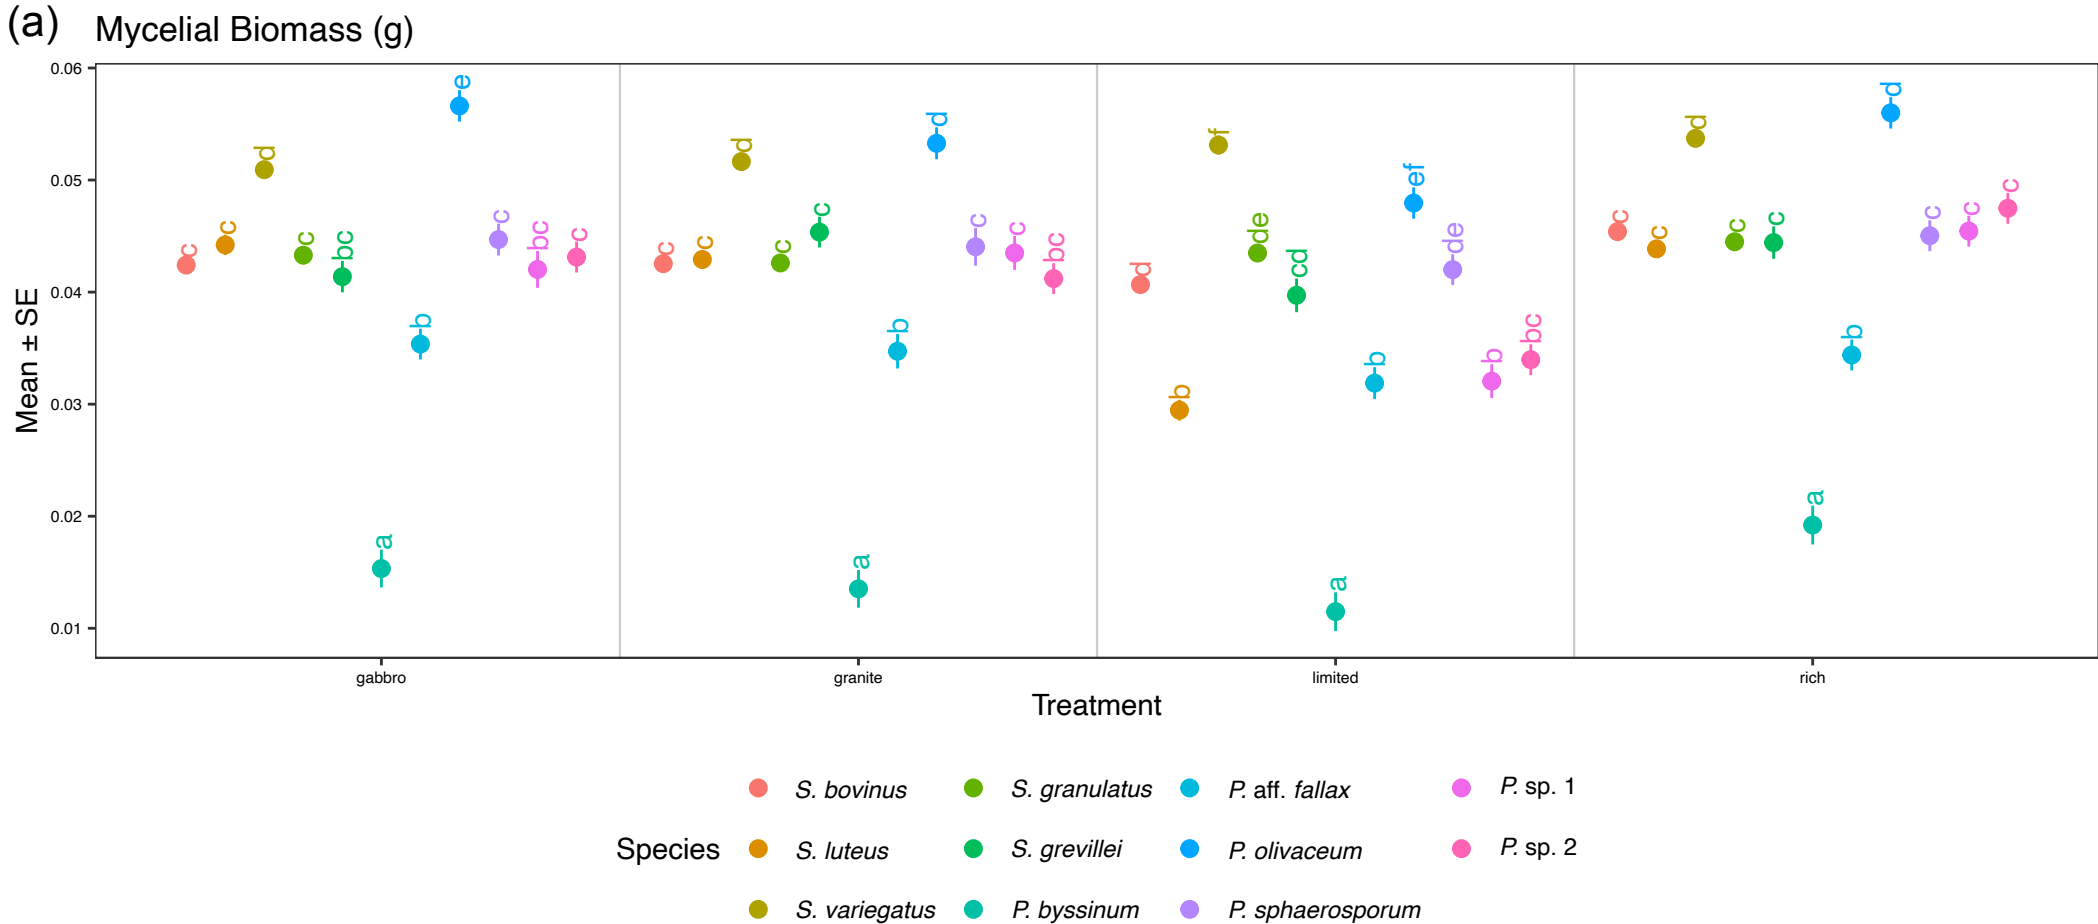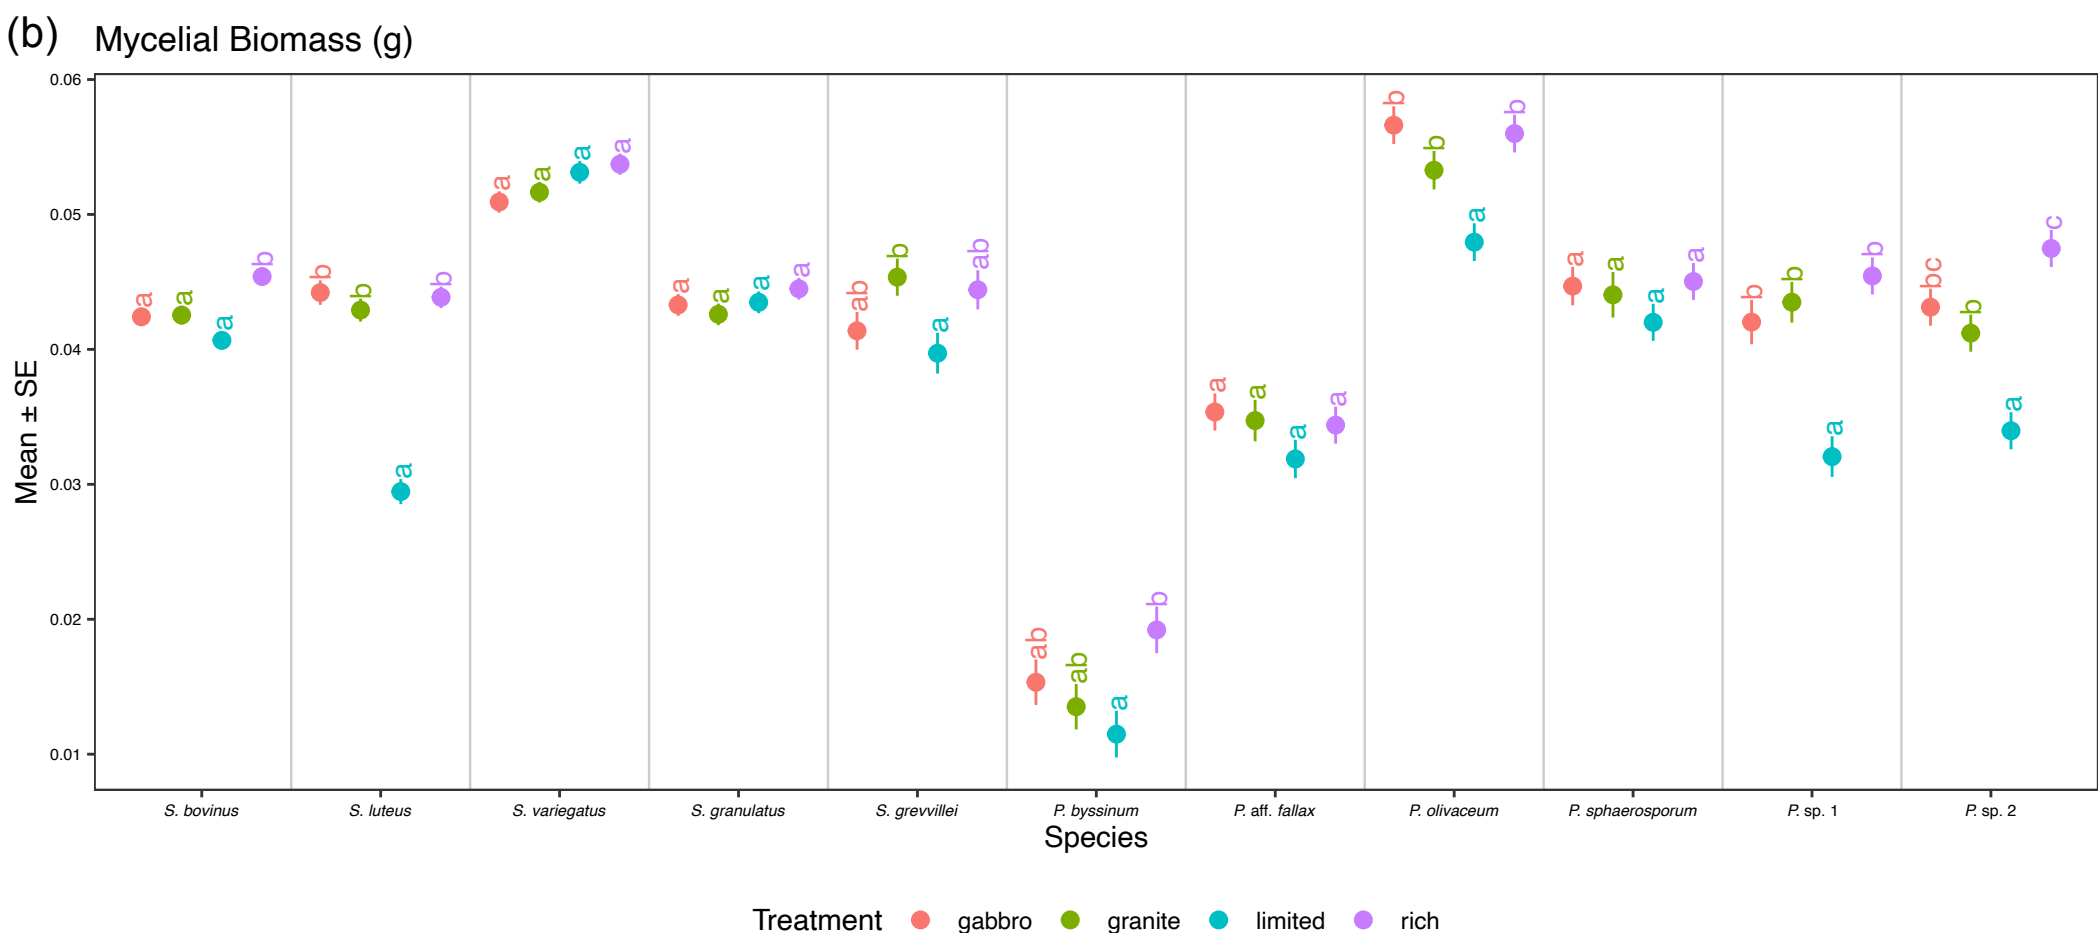

Figure S9 - Mycelial biomass of 13 species of ECM and saprotrophic fungi grown in pure culture in gabbro, granite, limited and rich treatments. In panel (a) data points represent the mean mycelial biomass for each species within each treatment, with error bars showing standard deviation. Different letters above data points indicate statistically significant differences between species within the same treatment, based on Tukey's HSD test at a significance level of  $p < 0.05$ . In panel (b) data points represent the mean mycelial biomass for each treatment within each species, with error bars showing standard deviation. Different letters above data points indicate statistically significant differences between treatments within the same species, again based on Tukey's HSD test at a significance level of  $p < 0.05$ . Species include Isolates include *Suillus bovinus*, *S. luteus*, *S. variegatus*, *S. granulatus*, *S. grevillei*, *Piloderma byssinum*, *P. aff. fallax*, *P. olivaceum*, *P. sphaerosporum*, *P. sp. 1*, and *P. sp. 2*.
