# Supplementary material for: Transporter gene family evolution in ectomycorrhizal fungi in relation to mineral weathering capabilities
Source: Copernicus journal article supplement (doi:10.5194/bg-22-8047-2025), 2025-12-17
Supplement: Supplementary file [file bg-22-8047-2025-supplement-title-page.pdf › bg-22-8047-2025-supplement-title-page.pdf]

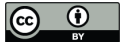

## *Supplement of*

# **Transporter gene family evolution in ectomycorrhizal fungi in relation to mineral weathering capabilities**

**Katharine King et al.**

*Correspondence to:* Katharine King ([katharine.king@slu.se](mailto:katharine.king@slu.se)) and Marisol Sánchez-García ([marisol.sanchez.garcia@slu.se](mailto:marisol.sanchez.garcia@slu.se))

- [bg-22-8047-2025-supplement-title-page.pdf](#)
- [Supplementary\\_Figure\\_S1.pdf](#)
- [Supplementary\\_Figure\\_S2.pdf](#)
- [Supplementary\\_Figure\\_S3.pdf](#)
- [Supplementary\\_Figure\\_S4.pdf](#)
- [Supplementary\\_Figure\\_S5.pdf](#)
- [Supplementary\\_Figure\\_S6.pdf](#)
- [Supplementary\\_Figure\\_S7.pdf](#)
- [Supplementary\\_Figure\\_S8.pdf](#)
- [Supplementary\\_Figure\\_S9.pdf](#)
- [Supplementary\\_Tables.xlsx](#)

The copyright of individual parts of the supplement might differ from the article licence.
