# Supplementary figures and images for: Transporter gene family evolution in ectomycorrhizal fungi in relation to mineral weathering capabilities
Source: Copernicus journal article supplement (doi:10.5194/bg-22-8047-2025), 2025-12-17

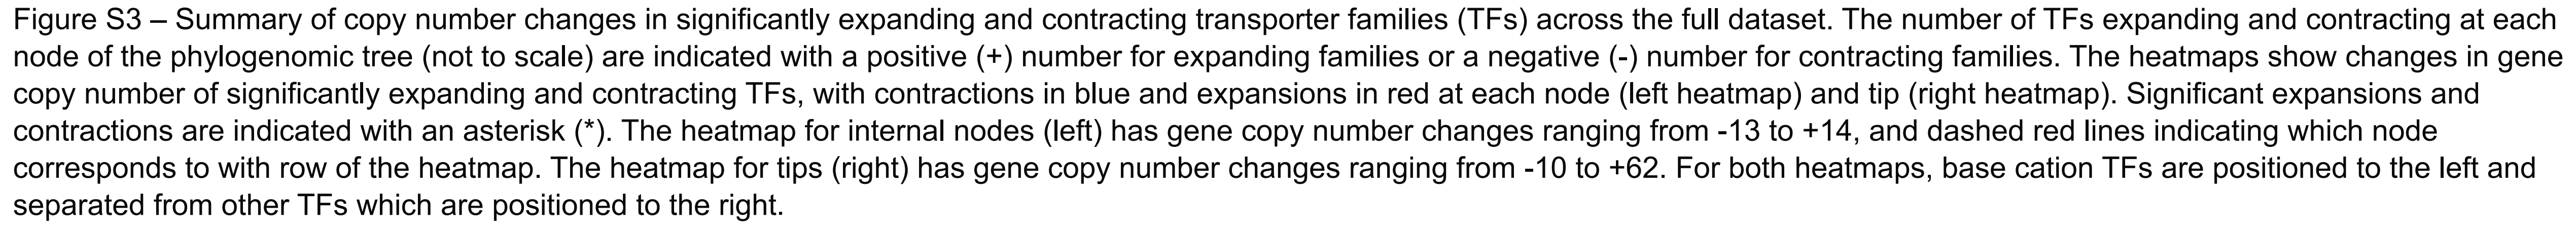

Supplement: Supplementary file 3 [file Supplementary_Figure_S3.pdf › Supplementary_Figure_S3.pdf]
